## **Osprey: Open-Source Processing, Reconstruction & Estimation of Magnetic Resonance Spectroscopy Data**

Georg Oeltzschner<sup>1,2,\*</sup>, Helge J. Zöllner<sup>1,2</sup>, Steve C. N. Hui<sup>1,2</sup>, Mark Mikkelsen<sup>1,2</sup>, Muhammad G. Saleh<sup>1,2</sup>, Sofie Tapper<sup>1,2</sup>, Richard A. E. Edden<sup>1,2</sup>

<sup>1</sup> *Russell H. Morgan Department of Radiology and Radiological Science, The Johns Hopkins University School of Medicine, Baltimore, MD, United States*

<sup>2</sup> *F. M. Kirby Research Center for Functional Brain Imaging, Kennedy Krieger Institute, Baltimore, MD, United States*

### **\*Corresponding author:**

Georg Oeltzschner, Ph.D.

Division of Neuroradiology, Park 367G

The Johns Hopkins University School of Medicine

600 N Wolfe St

Baltimore, MD 21287

[goeltzs1@jhmi.edu](mailto:goeltzs1@jhmi.edu)

*Running title:* Integrated open-source processing and modelling software for MRS

*Key words:* Magnetic resonance spectroscopy, pre-processing, linear-combination modelling, quantification, tissue correction

*Word count:* 6,362

## Abstract

**Background:** Processing and quantitative analysis of magnetic resonance spectroscopy (MRS) data are far from standardized and require interfacing with third-party software. Here, we present Osprey, a fully integrated open-source data analysis pipeline for MRS data, with seamless integration of pre-processing, linear-combination modelling, quantification, and data visualization.

**New Method:** Osprey loads multiple common MRS data formats, performs phased-array coil combination, frequency- and phase-correction of individual transients, signal averaging and Fourier transformation. Linear combination modelling of the processed spectrum is carried out using simulated basis sets and a spline baseline. The MRS voxel is coregistered to an anatomical image, which is segmented for tissue correction and quantification is performed based upon modelling parameters and tissue segmentation. The results of each analysis step are visualized in the Osprey GUI. The analysis pipeline is demonstrated in 12 PRESS, 11 MEGA-PRESS, and 8 HERMES datasets acquired in healthy subjects.

**Results:** Osprey successfully loads, processes, models, and quantifies MRS data acquired with a variety of conventional and spectral editing techniques.

**Comparison with Existing Method(s):** Osprey is the first MRS software to combine uniform pre-processing, linear-combination modelling, tissue correction and quantification into a coherent ecosystem. Compared to existing compiled, often closed-source modelling software, Osprey's open-source code philosophy allows researchers to integrate state-of-the-art data processing and modelling routines, and potentially converge towards standardization of analysis.

**Conclusions:** Osprey combines robust, peer-reviewed data processing methods into a modular workflow that is easily augmented by community developers, allowing the rapid implementation of new methods.

## 1. Introduction

Magnetic resonance spectroscopy (MRS) is the only methodology that can determine the levels of neurochemicals in living tissue non-invasively, providing a unique window on the neurobiology of the human brain in health and pathology. Over the course of several decades, the field has developed a wide range of data acquisition, processing, and quantitative analysis methods (Harris et al., 2017; Landheer et al., 2019; Öz et al., 2020; Wilson et al., 2019).

In general, state-of-the-art analysis of MRS data can be divided into three fundamental steps:

- 1. Pre-processing** of raw data that has been exported directly from the scanner or obtained from an institutional archiving system (PACS). Currently, no convention for a standardized MRS data format exists. Instead, each major vendor has developed proprietary file formats that store data in varying degrees of ‘rawness’ and limited information on acquisition parameters. Some of the most widely used file formats (DICOM MRS, Philips SDAT/SPAR, Siemens RDA, GE P-file) contain data that have been pre-processed to varying extents in the vendor-native online reconstruction environment. On-scanner processing relies on proprietary vendor-specific reconstruction code and is therefore neither standardized nor publicly documented.

Data processing can include basic low-level operations on the raw time-domain data (down-sampling, zero-filling, filtering, truncating, Fourier transformation), higher-level operations to improve critical signal properties like linewidth and signal-to-noise ratio (weighted receiver-coil combination, alignment of individual averages), and operations to address acquisition-related artefacts (removal of residual water signal, eddy-current correction).

- 2. Modelling** of the processed spectral data is performed to derive quantitative parameters that allow conclusions to be drawn about the levels of individual metabolites. The complexity of this process ranges from simple peak integration, through single-resonance modelling, to linear-combination algorithms to decompose spectra into their constituent signals. While simple models are easy to implement, the full information content of an MRS spectrum can only be unlocked by modelling it fully. The most widely used linear-combination algorithms are exclusively implemented in third-party compiled software,

either open-source (e.g. Tarquin (Wilson et al., 2011), Vespa<sup>1</sup>), or closed-source academic (e.g. the AQSES (Poulet et al., 2007) algorithm in jMRUI (Stefan et al., 2009)) or commercial (LCModel (Provencher, 1993)).

Despite their widespread use, all common fitting software packages are developed and maintained by small groups of researchers (or even a single individual), who often critically rely on third-party funding to keep the project alive.

- 3. Quantification** is here used to describe the process of converting quantitative modelling parameters into biologically meaningful estimates of metabolite levels. Depending on the complexity of the quantification method, this may entail simply taking ratios of peak areas, or include more sophisticated calculations such as correcting for the fraction of cerebrospinal fluid (CSF), tissue-specific relaxation correction (Gasparovic et al., 2006), or accounting for assumed differences of metabolite abundance between tissue classes (Harris et al., 2015).

The core task of *modelling* is usually performed by third-party software, which typically has limited capability of *pre-processing* and *quantification*. This forces researchers to create their own local pipeline, starting from a rich diversity of scanner-specific export formats, choosing an appropriate set of processing steps, and finally exporting the processed data into a format that is accepted by the modelling software. Many modelling software solutions include the calculation of signal amplitude ratios to a reference (creatine, N-acetyl aspartate, water), but at the time of writing, none of them allow direct incorporation of tissue-specific segmentation or metabolite-specific relaxation information. Therefore, researchers must, again, develop local custom code to import the modelling results, apply corrections, and calculate final quantitative measures. In contrast to popular imaging modalities like functional MRI, which have established publicly available analysis frameworks and software environments open to community contributions, a widely used standardized pipeline is currently not available for MRS data analysis.

We have identified several issues with these practices. In short, the current best practices are not only inefficient, but severely hinder the more widespread use of MRS as a research tool, and curb its potential as a clinical one:

---

<sup>1</sup> Brian J. Soher et al, <https://scion.duhs.duke.edu/vespa/project>



- a. **Waste of resources:** If every lab resorts to writing custom code to carry out the same task, a lot of time, energy, and funding is wasted into duplicate efforts.
- b. **Methodological heterogeneity:** The lack of a single analysis pipeline to include pre-processing, modelling and quantification forces all labs to rely on local custom code. Additionally, many labs conducting advanced methodological MRS research rely on their own, long-established pipelines (including either local or third-party modelling) and keep methodological developments local. This is detrimental to standardization, comparability, and transparency of data analysis.
- c. **High-entry threshold:** Developing custom analysis code represents an often insurmountable effort for new research groups for whom MRS is a potential tool, but not a primary focus, and who might not have the background knowledge, resources, or technical expertise to create a processing pipeline from scratch.
- d. **Inertia and slow evolution:** New methodological developments take longer than necessary to gain acceptance and become widely adopted, because newcomers struggle to implement them if the code is not made publicly available right away. Integrating new developments into compiled third-party software requires larger programming efforts, with low incentives for the developer to devote resources to this task.
- e. **Dependence and vulnerability:** To evolve and be maintained, third-party software is critically dependent on its developers. They may transition to different positions (or leave academia altogether), run out of funding, lack time or staff support, or simply have no incentive to actively develop the software. This is particularly true for closed-source or commercial software, or tools that are maintained by single individuals.

Here we describe a new open-source MATLAB-based toolbox “Osprey”. Osprey is an all-in-one software package that combines all steps of state-of-the-art pre-processing, linear-combination modelling, quantification, and visualization of MRS data. The Osprey framework is designed as a modular, fully open-source environment to flexibly adopt future methodological developments, accelerate their adaptation, and foster standardization. The entire source code of Osprey is available in the public domain, inviting improvements, bug fixes, and addition of state-of-the-art technical developments from the community.

## 2. Methods

The Osprey workflow is summarized in Fig. 1. Osprey consists of seven separate modules – **Job**, **Load**, **Proc**, **Fit**, **Coreg**, **Seg**, and **Quant**, all of which are sequentially called by simple MATLAB commands. Alternatively, users can conduct the entire workflow in a graphical user interface designed to minimize the amount of user input. The Osprey code builds upon functions and the organizational structure of FID-A (Simpson et al., 2017), an open-source collection of MATLAB scripts for simulating, loading, and processing MRS data.

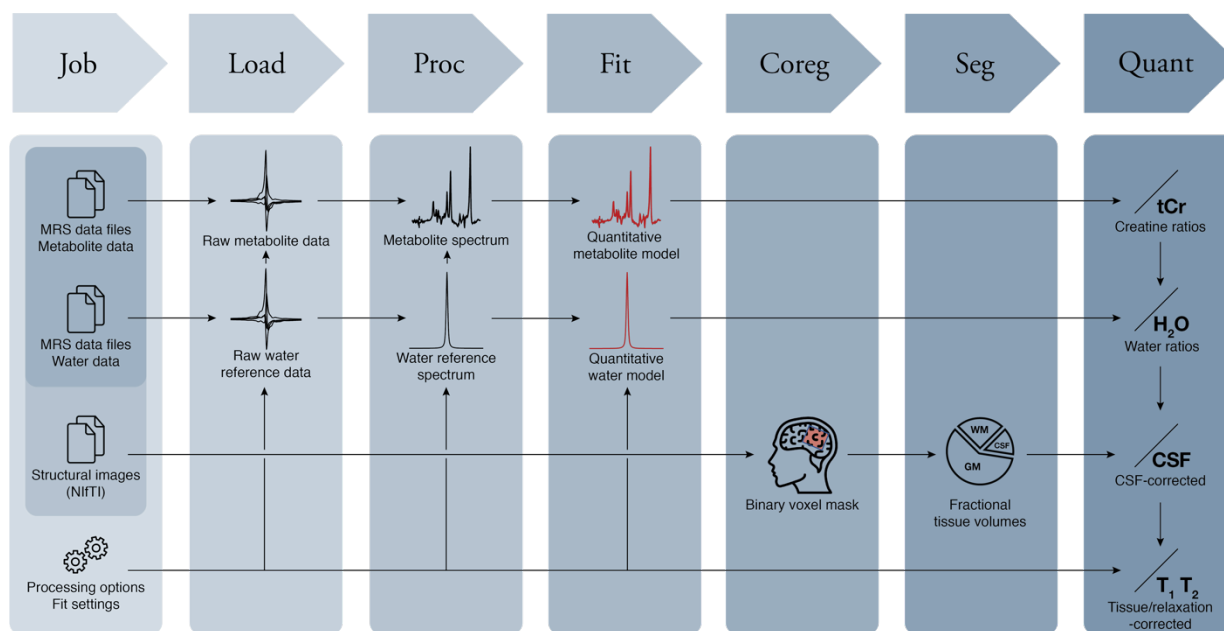

Figure 1: The Osprey workflow with the seven modules **Job**, **Load**, **Proc(ess)**, **Fit**, **Coreg(ister)**, **Seg(ment)**, and **Quant(ify)**.

### 2.1 Job

The only user interaction that is required to specify and conduct an Osprey data analysis is to define a **Job** in a job file. The job system allows easy batch processing of multiple datasets. The job file is a text file containing the paths to the MRS data files and structural image files to be processed, and parameters to control data processing and linear-combination modelling. In addition, the user must specify an output folder that Osprey will use to save exported data, coregistration and segmentation images, and quantitative result tables.

Osprey distinguishes between three classes of MRS data files:

- Metabolite (water-suppressed) data. These are a mandatory input.
- Lineshape reference data. These are an optional input, acquired with the same sequence as the metabolite data, but without water suppression, and used to perform eddy-current correction (Klose, 1990) of the metabolite data. If only lineshape reference data are provided, this signal is also used to calculate water-scaled concentration estimates.
- Short-TE reference data. These are another optional input. If the user provides short-TE reference data, they will be used to derive water-scaled concentration estimates (and lineshape data are only used for eddy-current correction). Using short-TE water as the concentration reference standard reduces  $T_2$ -weighting of the water reference signal (and associated correction errors) compared to long-TE water data.

In addition to the paths to the raw data files, the job file must specify the type of sequence (with or without spectral editing, such as MEGA (Mescher et al., 1998; Rothman et al., 1993), HERMES (Chan et al., 2016; Saleh et al., 2016), or HERCULES (Oeltzschner et al., 2019a)), the target molecules of spectral editing experiments, and options for the fitting process, which are explained in Section 2.4.

The job file can also specify an optional CSV file which is used to specify external statistical variables for the GUI visualization of batch analyses, such as age of subjects, diagnostic classifiers, or behavioral measures.

Upon execution, the *Job* command initializes a MATLAB structure array that serves as the superstructure for all settings and data that have been previously specified in the job file. All subsequent modules of the Osprey pipeline act solely on the superstructure created by the *Job* module. The name of the superstructure variable is the only argument to be passed on when calling other functions along the Osprey workflow.

## 2.2 Load

Osprey supports most common raw and processed file formats from major MRI vendors. This includes Philips (SDAT/SPAR, DATA/LIST), Siemens (RDA, TWIX) and GE (P-file) data. Additionally, single-file or multi-file DICOM datasets can be loaded. At the time of writing,

single-voxel conventional and various  $J$ -difference-edited data from many sequence implementations are supported.

Upon calling the ***Load*** command, Osprey parses the filename endings of the MRS data files to determine the correct file format. The appropriate loading functions then extract all relevant information from the headers to correctly load the raw spectroscopic data into the Osprey superstructure. Aside from the FIDs, the *Load* module saves the receiver bandwidth, repetition and echo times, number of averages, number of data points, transmitter frequency (or magnetic field strength), as well as information about voxel dimensions and positions.

The *Load* module also combines the signals from multi-channel receiver coils by determining the channel-specific phase and weighting each channel with the ratio of the signal to the square of the noise. Assuming uncorrelated noise, this procedure has been shown to yield the optimal signal-to-noise ratio (Hall et al., 2014). If lineshape reference or short-TE reference data are provided, they are used instead of the metabolite data to determine the phasing and weighting parameters.

The coil-combined (but un-aligned and un-averaged) data is stored in FID-A data structure arrays within the Osprey superstructure for further processing.

### 2.3 *Proc*

The ***Proc*** (Process) module performs all necessary steps to translate the raw, un-aligned, un-averaged data into spectra that are ready to be modeled.

The pre-processing pipeline includes the following steps: 1) alignment of individual averages using spectral registration in the time domain (Near et al., 2015); 2) averaging; 3) Fourier transformation; 4) automatic determination of the correct polarity of the spectrum since some water-suppression schemes can result in negative residual water peaks; 5) residual water removal by singular-value decomposition of the signal (Barkhuijsen et al., 1987) and subtracting components between 4.6 and 4.8 ppm; 6) linear baseline correction (based on the mean of 100 data points at the far edges of the frequency domain spectrum; 7) correct frequency referencing based on a single-Lorentzian fit to the 2.01 ppm NAA singlet. If lineshape reference data are available, the Klose method (Klose, 1990) is applied to correct the metabolite spectra for eddy-currents.

For *J*-difference-edited experiments (MEGA, HERMES, HERCULES), sub-spectra are aligned by minimizing the frequency-domain difference signal within a particular frequency range containing identical signal in pairs of sub-spectra. As an example, the edit-ON and edit-OFF spectra in GABA-edited MEGA data usually share a considerable residual water signal that is used for alignment. In contrast, the residual water signal is suppressed in the edit-ON spectra of GSH-edited MEGA data due to the editing pulse being applied at 4.56 ppm. In this case, the 2.01 ppm NAA signal is used for alignment. After sub-spectrum alignment, difference and sum spectra are calculated and stored.

In addition to performing the automated processing, Osprey determines several quality-control parameters. Linewidth is determined as the full-width half-maximum of a single-Lorentzian fit to the NAA peak (between 1.8 and 2.2 ppm). SNR is determined as the ratio between the amplitude of the NAA peak and the standard deviation of the detrended noise between  $-2$  and 0 ppm. The frequency drift over the course of the experiment is determined based on the creatine signal in every single average (creatine and choline signals that nominally appear at 3.02 and 3.20 ppm are modeled by two Lorentzians).

The *Proc* module can optionally export the fully processed spectra to output subfolders, in formats readable by external third-party fitting software (LCModel, Tarquin, jMRUI, Vespa). This feature allows users to perform traditional data modelling, with the benefit of improved SNR and linewidth resulting from optimized coil-combination and alignment of individual averages – features that the established software solutions currently do not offer. For spectral editing data, separate files are created for the difference and sum spectra, as well as for each sub-experiment (edit-ON/OFF for MEGA, A/B/C/D for HERMES/HERCULES). Additional files are created for the lineshape and short-TE water data, if available. If water reference data acquired are with spectral editing sequences, the subspectra are added and saved as a single file.

#### 2.4 *Fit*

The *Fit* module models the processed spectra passed from the *Proc* module with a linear combination of basis functions. The default Osprey model is designed to mimic several key features of the algorithms implemented in LCModel and Tarquin. It requires a sequence-specific

basis set, which is automatically selected by Osprey based on the vendor, sequence type, and sequence parameters. Several fit options are specified in the job file, e.g. the frequency range over which the spectrum is to be modelled, and the baseline flexibility (as controlled by the minimum ppm-spacing between neighboring knots of the cubic baseline spline).

The *Fit* module requires a sequence-specific basis set, which is automatically selected by Osprey based on the vendor, sequence type, and sequence parameters. Osprey basis sets can be generated with a single command line function from a set of spectra that have been simulated with FID-A. Several sequence-specific basis sets for commonly used implementations of PRESS, MEGA-PRESS, HERMES, and HERCULES are included, derived from fast spatially resolved density-matrix simulations (Zhang et al., 2017) using ideal excitation and shaped refocusing pulses. Additional basis sets can be generated either by users or upon request by the authors, and added to the repository. Basis functions for macromolecule and lipid functions are added by generating Gauss-shaped signals with properties summarized in Table 1.

| <i>Name</i> | <i>Frequencies [ppm]</i> | <i>FWHM [ppm]</i> | <i>Amplitude</i> |
|-------------|--------------------------|-------------------|------------------|
| MM09        | 0.91                     | 0.14              | 3.00             |
| MM12        | 1.21                     | 0.15              | 2.00             |
| MM14        | 1.43                     | 0.17              | 2.00             |
| MM17        | 1.67                     | 0.15              | 0.20             |
| MM20        | 2.08                     | 0.15              | 1.33             |
|             | 2.25                     | 0.20              | 0.33             |
|             | 1.95                     | 0.15              | 0.33             |
|             | 3.00                     | 0.20              | 0.40             |
| Lip09       | 0.89                     | 0.14              | 3.00             |
| Lip13a      | 1.28                     | 0.15              | 2.00             |
| Lip13b      | 1.28                     | 0.089             | 2.00             |
| Lip20       | 2.04                     | 0.15              | 1.33             |
|             | 2.25                     | 0.15              | 0.67             |
|             | 2.80                     | 0.20              | 0.87             |

*Table 1: Default properties of the macromolecule and lipid basis functions included in Osprey basis sets, mimicking the approach of LCMoDel (section 11.7 of the LCMoDel manual).*

*Amplitude values are scaled relative to the 3.02 ppm Cr CH<sub>3</sub> singlet in the basis set, which has amplitude 3.*

The *Fit* module interpolates the basis set to match the resolution (data points per ppm) of the processed spectra. All spectra of a single dataset (water-suppressed and water-unsuppressed) are then scaled to the basis set to facilitate convergence of the subsequent optimization.

Prior to the full analysis, two preparation steps are carried out. First, for optimal frequency referencing, the spectrum is cross-correlated with a sum of unit delta functions at 2.01 ppm, 3.03 ppm, and 3.21 ppm, representing the major landmark singlets from NAA, Cr, and Cho, respectively, and the frequency shift corresponding to the offset of the cross-correlation function is applied to the spectrum. Second, to obtain good starting values for the phase and linebroadening parameters, a preliminary fit is performed with a reduced basis set only including the basis functions of NAA, Cr, PCh, Glu, and Ins, and a more flexible baseline with a knot spacing of 0.15 ppm. The final phase and linebroadening estimates from this preliminary fit are used as starting values for the full fit. Together with the initial referencing step, selecting a reasonable starting point for the non-linear parameters helps stabilize the optimization problem.

Osprey fits the real part of the frequency-domain spectrum  $Y(\nu)$  using a model similar to the one used by the LCMModel algorithm. The  $N_M$  simulated time-domain metabolite basis functions  $m_m(t)$  in the basis set receive the same Gaussian linebroadening  $\gamma$ , and individual Lorentzian linebroadenings  $\alpha_m$  and frequency shifts  $\omega_m$  ( $m = 1, \dots, N_M$ ) before they are Fourier-transformed into the frequency domain:

$$M_m(\nu; \alpha_m, \omega_m) = FFT(m_m(t) \exp(-i\omega_m t - \alpha_m t - \gamma t^2))$$

To account for deviations from a perfect Voigtian lineshape as determined by the linebroadening parameters, the frequency-domain basis spectra are then convolved with an arbitrary, unregularized lineshape model. This supplementary lineshape model  $\mathcal{S}$  has a length equal to a spectral width of 2.5 times the coarse estimate of the FWHM of the spectrum that was estimated during the initial referencing step.  $\mathcal{S}$  is normalized, so that this convolution does not impact the integral of signals, and is initialized as a unit delta function at the central point.

The smooth baseline is constructed as a linear combination of  $N_B$  normalized, equally spaced cubic B-spline basis functions  $B_j(\nu)$  with coefficients  $\beta_j$  ( $j = 1, \dots, N_B$ ), with knots 2 and  $(N_B - 1)$

located on the edges of the fit range, and two additional knots outside the modeled range.  $N_B$  is determined from the fit range based upon the minimum knot spacing condition that the user specifies in the job file. In contrast to the LCModel algorithm, the default Osprey model does not currently include baseline regularization. To prevent an unreasonably flexible baseline without using a regularizer, the default Osprey spline knot spacing is increased to 0.4 ppm, compared to the default LCModel ‘DKNTMN’ setting of 0.15 ppm.

The model spectrum  $\hat{Y}(v)$  is constructed from these components as follows:

$$\hat{Y}(v) = \exp[i(\varphi_0 + \varphi_1(v))][\sum_{j=1}^{N_B} \beta_j B_j + \sum_{m=1}^{N_M} A_m [M_m * \mathcal{S}]].$$

Here,  $\varphi_0$  represents the global zero-order phase correction;  $\varphi_1(v)$  the global first-order (linear) phase correction; and  $A_m$  the amplitude of each metabolite/MM/lipid basis function.

To minimize the sum of squares of the difference between the data  $Y(v)$  and the model  $\hat{Y}(v)$ , the *Fit* module uses an implementation of the popular Levenberg-Marquardt (Levenberg, 1944; Marquardt, 1963) non-linear least-squares optimization algorithm that allows hard constraints to be imposed on the parameters<sup>2</sup>. The amplitude parameters applied to the metabolite and baseline spline basis functions occur linearly in the model, and are determined at each iteration of the non-linear algorithm with a limited-memory algorithm for bound constrained optimization (L-BFGS-B)<sup>3</sup> (Byrd et al., 1995; Zhu et al., 1997), constraining the metabolite amplitudes to be non-negative ( $A_i \geq 0$ ). Default hard constraints on non-linear parameters and weak soft constraints on macromolecule and lipid amplitudes are imposed to stabilize the solution, and are defined as they are in LCModel and Tarquin (Table 2).

---

<sup>2</sup> Alexander Dentler (2020), [alexander.dentler@gmail.com](mailto:alexander.dentler@gmail.com). Levenberg-Marquardt toolbox (<https://www.mathworks.com/matlabcentral/fileexchange/53449-levenberg-marquardt-toolbox>), MATLAB Central File Exchange. Retrieved January 16, 2020.

<sup>3</sup> Stephen Becker (2020). LBFGB (L-BFGS-B) mex wrapper (<https://www.mathworks.com/matlabcentral/fileexchange/35104-lbfgsb-l-bfgs-b-mex-wrapper>), MATLAB Central File Exchange. Retrieved January 16, 2020.



| Hard constraints | <i>Parameter</i>         | <i>Lower bound</i> | <i>Upper bound</i>      | Weak soft constraints | <i>Metab 1</i> | <i>Metab 2</i> | <i>Ratio</i> |
|------------------|--------------------------|--------------------|-------------------------|-----------------------|----------------|----------------|--------------|
|                  | $\varphi_0$              | $-359^\circ$       | $359^\circ$             |                       | NAAG           | NAA            | 0.15         |
|                  | $\varphi_1$              | $-10^\circ/ppm$    | $10^\circ/ppm$          |                       | Lip09          | Lip13          | 0.267        |
|                  | $\gamma$                 | $0\text{ Hz}$      | $\sqrt{5000}\text{ Hz}$ |                       | Lip20          | Lip13          | 0.15         |
|                  | $\alpha_m$ (metabolites) | $0\text{ Hz}$      | $10\text{ Hz}$          |                       | MM20           | MM09           | 1.5          |
|                  | $\alpha_m$ (MM/lipids)   | $0\text{ Hz}$      | $100\text{ Hz}$         |                       | MM12           | MM09           | 0.3          |
|                  | $\omega_m$ (metabolites) | $-0.03\text{ ppm}$ | $0.03\text{ ppm}$       |                       | MM14           | MM09           | 0.75         |
|                  | $\omega_m$ (MM/lipids)   | $-0.05\text{ ppm}$ | $0.05\text{ ppm}$       |                       | MM17           | MM09           | 0.375        |

Table 2: Hard constraints on fitting parameters, and weak soft constraints on amplitude ratios.

Water-unsuppressed data are modelled from a simulated water resonance with the same constrained non-linear least-squares algorithm using a simplified model, only including the following six hard-constrained modelling parameters: zero-order phase ( $-2\pi \leq \varphi_0 \leq 2\pi$ ), first-order phase ( $-\frac{\pi}{4} \leq \varphi_1 \leq \frac{\pi}{4}$ ), Gaussian linebroadening ( $0\text{ Hz} \leq \gamma \leq \sqrt{5000}\text{ Hz}$ ), Lorentzian linebroadening ( $0\text{ Hz} \leq \alpha \leq 50\text{ Hz}$ ), frequency shift ( $-15\text{ Hz} \leq \omega \leq 15\text{ Hz}$ ), and amplitude  $A$ . No baseline is included in the water model.

For J-difference-edited experiments, the user can choose between two fitting styles in the job file. When the ‘Concatenated’ fitting style is selected, all difference spectra and the sum spectrum are modeled simultaneously. In this case, the amplitude, lineshape, phase and linebroadening parameters are shared between the models for each sub-spectrum, while each sub-spectrum maintains its own baseline parameters and is allowed an additional small frequency shift to account for small inconsistencies between sub-spectra. The simultaneous modelling approach incorporates all available spectral information to constrain the model in a way that is most consistent with the data, thereby reducing the variability of the quantification results compared to unconstrained separate modelling (Oeltzschner et al., 2019a). When the ‘Separate’ fitting style is selected, each difference spectrum is modeled separately – one for MEGA-edited data, two (or more) for Hadamard-edited data like HERMES and HERCULES. In this case, the editing-off spectrum (for MEGA) or the sum spectrum (for HERMES/HERCULES) is also separately modeled.

## 2.5 *Coreg*

The ***Coreg*** module uses information about size, position and orientation of the MRS voxel in scanner-space coordinates (which were extracted from header by *Load*) to create a binary voxel mask, i.e., a 3D image in which the values 1 and 0 represent locations inside or outside the MRS voxel, respectively. While the definitions of the voxel orientation parameters differ between vendors, in each case, they uniquely define the dimensions and positioning of the voxel in scanner space. The binary voxel mask is then transformed to the same coordinate system as the structural image (in NIfTI format) that the user provides in the job file. This step ensures that the voxel mask is coregistered to the structural image, and reproduces the original voxel placement.

Finally, the coregistered voxel mask is saved in NIfTI format using SPM12 (<https://www.fil.ion.ucl.ac.uk/spm/software/spm12/>) volume processing tools.

## 2.6 *Seg*

The ***Seg*** module invokes the SPM12 segmentation function to segment the structural image into gray matter (GM), white matter (WM), and cerebrospinal fluid (CSF). The coregistered voxel mask that was created by the *Coreg* module is then overlaid with the GM, WM, and CSF tissue probability maps. The ***Seg*** module then calculates fractional tissue volumes  $f_{vol}$  for GM, WM and CSF according to:

$$f_{vol,k} = \frac{\sum_N p_k(n)}{N},$$

with the tissue probabilities  $p_k(n)$  for the tissue class  $k \in GM, WM, CSF$  and the  $n$ -th image voxel ( $n \in 1, 2, \dots, N$ ), where  $N$  represents the number of image voxels within the MRS voxel.

## 2.7 *Quant*

The ***Quant*** (Quantify) module calculates various quantitative outputs, depending on the available modelling parameters that have been determined during the *Fit* process:

- Ratios of the metabolite signal amplitudes  $S_{met}$  to the total creatine amplitude

$$S_{tCr} = S_{Cr} + S_{PCr}$$

are always determined, regardless of whether water data have been provided, according to

$$[met]_{tCr} = \frac{S_{met}}{S_{tCr}}$$

These tCr ratios are reported as raw ratios, i.e. no relaxation correction or accounting for tissue composition is applied. In difference-edited experiments, the Cr resonances are usually subtracted out in the difference spectra. In these cases, the tCr reference is determined from the edit-OFF spectrum if the fit option ‘Separate’ has been selected, and from the sum spectrum if the fit option ‘Concatenated’ has been selected.

- When an unsuppressed water signal is provided, Osprey can report water-scaled metabolite estimates. If both lineshape reference data (i.e. data with the same TE as the water-suppressed data) and additional short-TE water data are available, the latter will be used as the water-scaling reference signal. Osprey reports water-scaled metabolite estimates according to:

$$[met]_{H_2O} = \frac{S_{met}}{S_{H_2O}} \times [H_2O] \times f_{H_2O} \times \frac{1 - e^{-\frac{TR_w}{T_{1w}}}}{1 - e^{-\frac{TR_{met}}{T_{1met}}}} \times \frac{e^{-\frac{TE_w}{T_{2w}}}}{e^{-\frac{TE_{met}}{T_{2met}}}}$$

Here,  $[H_2O]$  is the molal concentration of pure MR-visible water (55.5 mol/kg of MR-visible water (Gasparovic et al., 2006; Knight-Scott et al., 2003));  $f_{H_2O}$  is the relative water density of white matter;  $TR_w$ ,  $TR_{met}$ ,  $TE_w$ ,  $TE_{met}$  are the repetition and echo times of the water-unsuppressed and water-suppressed acquisitions;  $T_{1w}$  and  $T_{2w}$  are averaged relaxation times for tissue water (for brain data at 3T,  $T_{1w} = 1100$  ms and  $T_{2w} = 95$  ms (Wansapura et al., 1999));  $T_{1met}$  and  $T_{2met}$  are the averaged relaxation times of all metabolites and generated from a lookup table that can be modified by the user. No tissue correction is applied. These water-scaled estimates are calculated even if no tissue composition information (from the *Seg* module) is available.

- When unsuppressed water data and tissue segmentation are available, Osprey calculates water-scaled metabolite estimates corrected for the volume fraction of CSF in the voxel according to

$$[met]_{CSFcorr} = \frac{[met]_{H_2O}}{1 - f_{vol,CSF}}$$

Here,  $[met]_{H_2O}$  is the water-scaled metabolite estimate obtained in the previous step, and  $f_{vol,CSF}$  is the fractional tissue volume of CSF as determined by the *Seg* module.

- Finally, Osprey derives fully tissue-and-relaxation-corrected molal concentration estimates according to the *Gasparovic* method (Gasparovic et al., 2006), according to

$$[met]_{TissCorr} = \frac{S_{met}}{S_{H_2O}(1 - f_{CSF})} \times [H_2O] \times \frac{f_{GM} \times R_{H_2O\_GM} + f_{WM} \times R_{H_2O\_WM} + f_{CSF} \times R_{H_2O\_CSF}}{R_{met}}$$

Here,  $f_{GM}$ ,  $f_{WM}$  and  $f_{CSF}$  are the molal water fractions for GM, WM and CSF, which are derived from the volume fractions according to

$$f_k = \frac{f_{vol,k} \times conc_{H_2O,k}}{f_{vol,GM} \times conc_{H_2O,GM} + f_{vol,WM} \times conc_{H_2O,WM} + f_{vol,CSF} \times conc_{H_2O,CSF}}$$

with the relative water densities  $conc_{H_2O,GM} = 0.78 [H_2O]$ ,  $conc_{H_2O,WM} = 0.65 [H_2O]$ , and  $conc_{H_2O,CSF} = 0.97 [H_2O]$ . Tissue-specific relaxation corrections are calculated

according to  $R_{H_2O\_k} = \left(1 - e^{-\frac{TR_w}{T_{1w,k}}}\right) \times e^{-\frac{TE_w}{T_{2w,k}}}$  and  $R_{met} = \left(1 - e^{-\frac{TR_{met}}{T_{1met}}}\right) \times e^{-\frac{TE_{met}}{T_{2met}}}$ .

Relaxation times for metabolites and water at 3T field strength were adapted from several widely used references (Edden et al., 2012; Mlynárik et al., 2001; Puts et al., 2013; Wansapura et al., 1999; Wyss et al., 2018).

For GABA-edited spectra, Osprey calculates an additional ‘alpha correction’ metric (Harris et al., 2015) that normalizes for the fact that GABA levels are higher in gray matter than in white matter (Jensen et al., 2005).

Osprey saves all available quantitative results for the entire job as comma-separated value (CSV) tables to a subfolder “QuantifyResults” in the output folder. This easily accessible format provides a direct interface to external third-party software for subsequent statistical analysis and visualization (e.g. R, SPSS).

## 2.8 GUI

While all Osprey analysis steps can be carried out with simple MATLAB console commands, the Osprey GUI serves as the central hub for data visualization and quality assessment. Once a job file is loaded, all analysis steps can be triggered with dedicated GUI buttons, and the results from each step can be viewed on separate tabs, for each sub-spectrum from each dataset in the job. The ‘Load’ tab displays the pre-aligned, pre-averaged data, while the ‘Process’ tab shows the aligned individual transients, the final averaged spectra that are passed on to the *Fit* module, as well as information about the frequency history of the experiment pre- and post-alignment, and the basic quality assessment metrics (linewidth and SNR). The ‘Fit’ tab shows the spectrum, the complete fit, residual, baseline, and individual basis function contributions. The ‘Coreg/Seg’ tabs visualizes the results of voxel coregistration and segmentation, and the ‘Quantify’ tab features tables with all available quantitative outcome measures.

The additional ‘Overview’ tab provides useful summary visualizations of batched jobs with many datasets. It provides visualization of mean spectra with overlaid ribbon plots of the standard deviation; mean fit, residual, and baseline; raincloud plots (Allen et al., 2019; Whitaker et al., 2019) of quantitative results for quick assessment of the population distributions of metabolite estimates; and interactive display of correlation plots between metabolite estimates. If the job file was specified in CSV format and included assignment of each dataset to a group (e.g. patients or control subjects), the data in each raincloud and correlation plot is separated by the group variable.

## 2.9 Demonstration

To demonstrate the consistency and versatility of the processing and modelling capabilities of Osprey, several single-voxel MRS datasets from the Big GABA dataset (Mikkelsen et al., 2019, 2017) were loaded, processed, and modelled.

Twelve PRESS datasets acquired on a 3.0T GE scanner (GE Healthcare, Milwaukee, United States) were selected. Parameters included: TR/TE = 2000/35 ms; 32 averages;  $30 \times 30 \times 30$  mm<sup>3</sup> voxel in midline parietal cortex; 5 kHz bandwidth with 4096 data points.

Further, eleven GABA-edited MEGA-PRESS datasets from the Big GABA repository, acquired on a 3.0T Philips scanner (Philips Healthcare, Best, The Netherlands), were loaded, processed, and modelled. Parameters that differed from the PRESS parameters included: TE = 68 ms; 320 averages; 15-ms editing pulses applied at 1.9 ppm (edit-ON) and 7.5 ppm (edit-OFF).

Finally, eight GABA/GSH-edited HERMES datasets, acquired on a 3.0T Philips scanner (Philips Healthcare, Best, The Netherlands), were loaded, processed, and modelled. Parameters that differed from the MEGA-PRESS parameters included: TE = 80 ms; 20-ms editing pulses applied in the GABA/GSH HERMES scheme (Saleh et al., 2016).

### 3. Results

All twelve PRESS datasets were successfully loaded and processed in Osprey, and are plotted in Figure 2A. The mean of these processed spectra (and  $\pm$  one standard deviation range) is shown in Figure 2B, along with the mean of the model spectra and the mean modelling residual. NAA SNR was  $184 \pm 26$  and NAA linewidth was  $7.1 \pm 1.2$  Hz. The results of quantification of these spectra are summarized in the following. tCr ratios of NAA, mI and Glx were  $1.44 \pm 0.07$ ,  $0.73 \pm 0.07$ , and  $1.23 \pm 0.14$ , respectively. Water-scaled estimates of NAA, mI and Glx, for example, were  $19.97 \pm 0.96$  i.u.,  $2.52 \pm 0.24$  i.u., and  $17.08 \pm 1.43$  i.u., respectively.

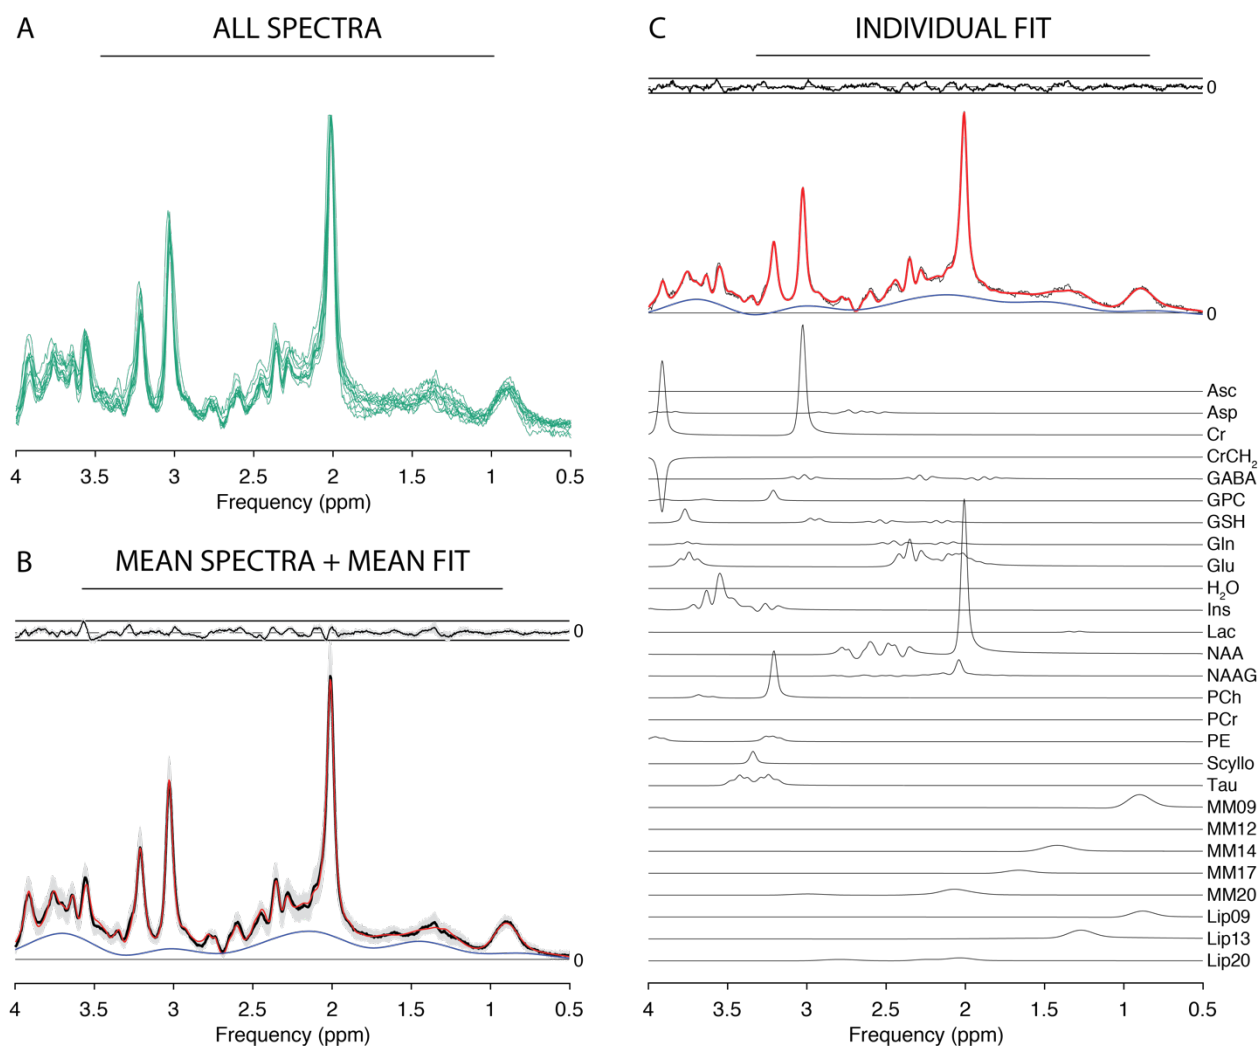

Figure 2: Results from the Osprey processing and modelling of PRESS data. (A) Individual spectra; (B) mean spectra (black)  $\pm$  SD (gray ribbons); mean fit (red), mean residual (above). (C) Example fit with contributions from individual metabolites (Asc ascorbate; Asp aspartate; Cr creatine; GABA  $\gamma$ -aminobutyric acid; GPC glycerophosphocholine; GSH glutathione; Gln glutamine; Glu glutamate; Ins myo-inositol; Lac lactate; NAA N-acetylaspartate; NAAG N-acetylaspartylglutamate; PCh phosphocholine; PCr phosphocreatine; PE phosphoethanolamine; Scyllo scyllo-inositol; Tau taurine).

GABA-edited MEGA-PRESS datasets were also successfully loaded, processed and modelled in ‘Separate’ mode, as summarized in Figure 4A and B. NAA SNR was  $282 \pm 51$ , while the NAA linewidth was  $4.7 \pm 0.5$  Hz. GABA levels were quantified as  $0.13 \pm 0.05$  (tCr ratio) and  $1.49 \pm 0.64$  i.u. (water-scaled), respectively.

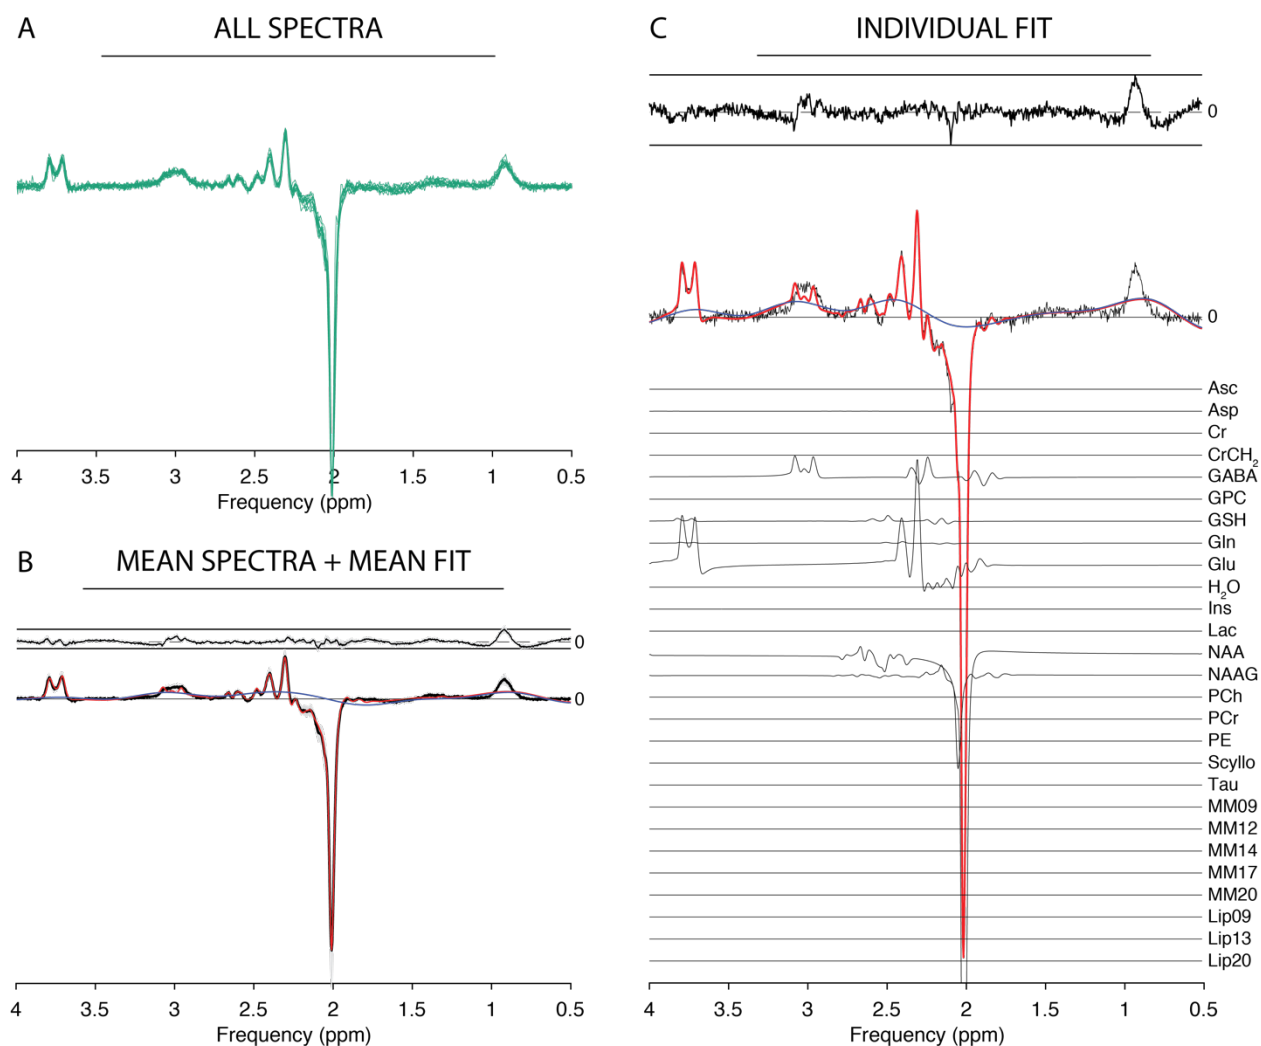

Figure 3: Results from the Osprey processing and modelling of GABA-edited MEGA-PRESS data. (A) Individual spectra; (B) mean spectra (black) +/- SD (gray ribbons); mean fit (red), mean residual (above). (C) Example fit with contributions from individual metabolites.

Similarly, the HERMES data are summarized in Figure 5. NAA SNR was  $226 \pm 33$  with a NAA linewidth of  $5.2 \pm 0.5$  Hz. GABA and GSH levels were estimated as  $0.17 \pm 0.04$  and  $0.19 \pm 0.03$  (tCr ratios), and  $1.79 \pm 0.43$  i.u. and  $1.99 \pm 0.44$  i.u. (water-scaled), respectively.



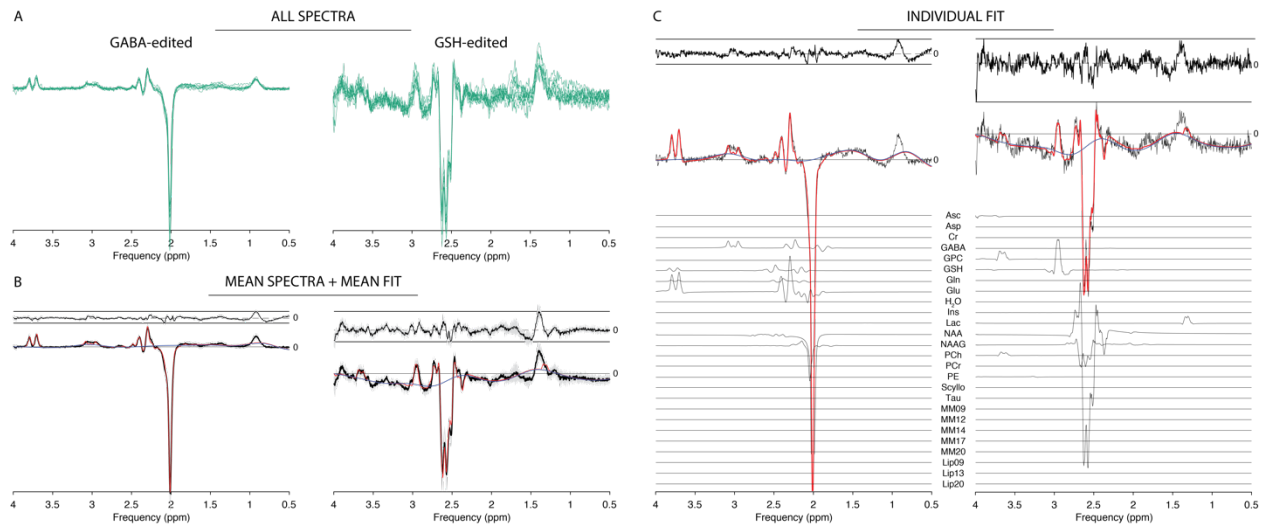

*Figure 4: Results from the Osprey processing and separate-mode modelling of GABA/GSH-edited HERMES data. (A) Individual spectra; (B) mean spectra (black) +/- SD (gray ribbons); mean fit (red), mean residual (above). (C) Example fit with contributions from individual metabolites.*

The figures show individual spectra overlaid (green lines) in panel A, demonstrating consistent high-quality data resulting from the Osprey processing pipeline. Panels B display mean spectra (black solid lines), the standard deviation of the spectra (gray ribbon plots), mean model fits (red) and mean residuals (above the spectra) across all datasets. Panels C show representative linear-combination modelling. The fits approximate the data well with a relatively smooth baseline. The most prominent unmodeled features in the residual are contributions from macromolecules in the difference spectra, which are difficult to simulate appropriately.

The structure of the GUI is shown in Figure 5. The workflow buttons corresponding to the different Osprey modules are in the left column, as well as a list of loaded datasets from which the user selects the dataset to be displayed. The tabs above the data display panels are used to switch between the analysis stages, and the tabs below correspond to different sub-spectra (here A, B, C, D, sum and difference spectra for HERMES data, along with water reference data).

Figure 6 shows the GUI data display panels corresponding to the various stages of analysis of a single HERMES dataset, exemplifying the visualization of spectral-editing sub-experiments.

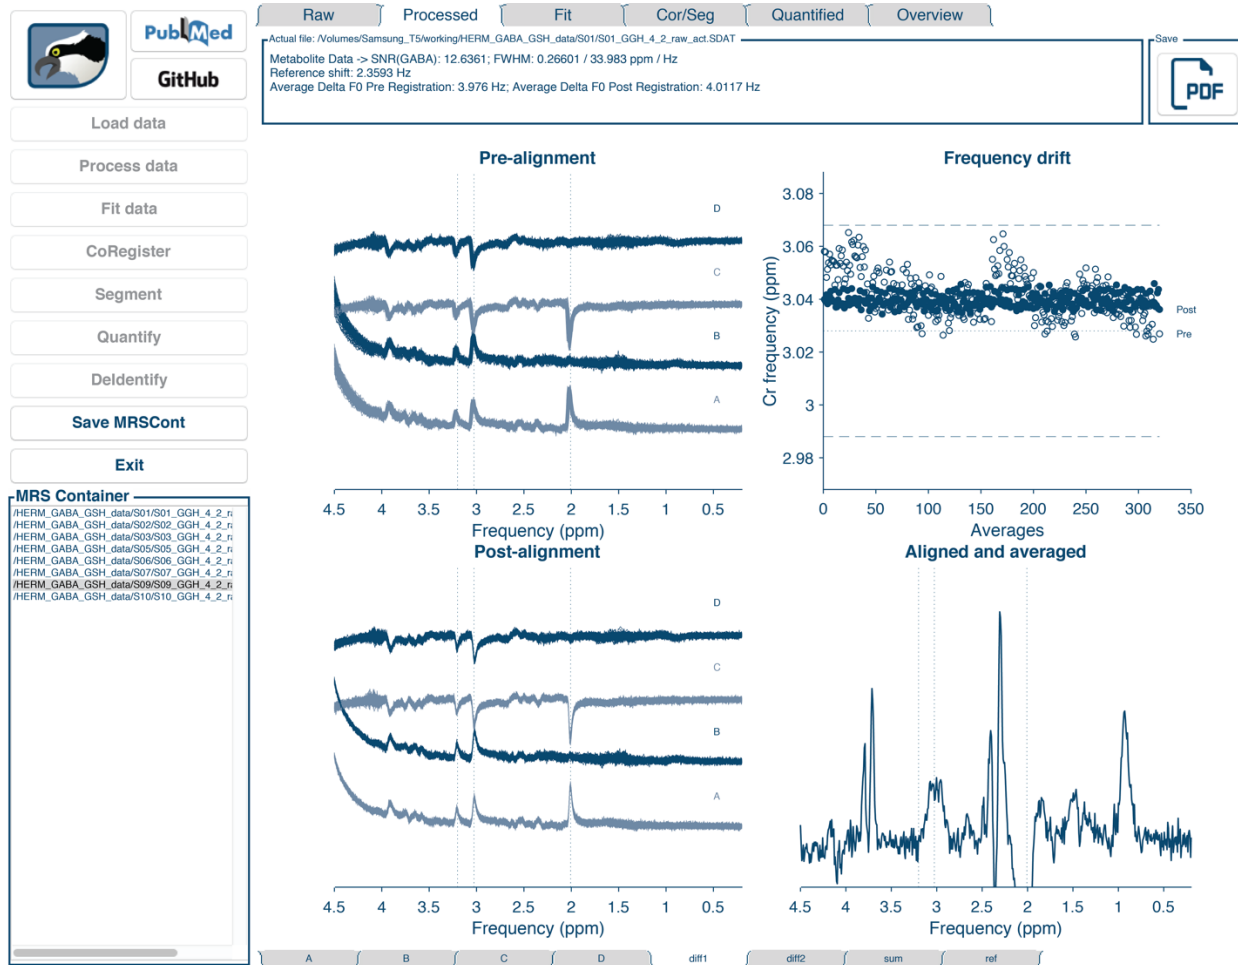

Figure 5: The Osprey GUI with workflow buttons (left), list of datasets (bottom left), analysis stage selection tabs (top row), sub-spectrum selection tabs (bottom row), and data display panel. The figure shows a GABA-GSH-edited HERMES dataset, with sub-experiments A, B, C, and D.

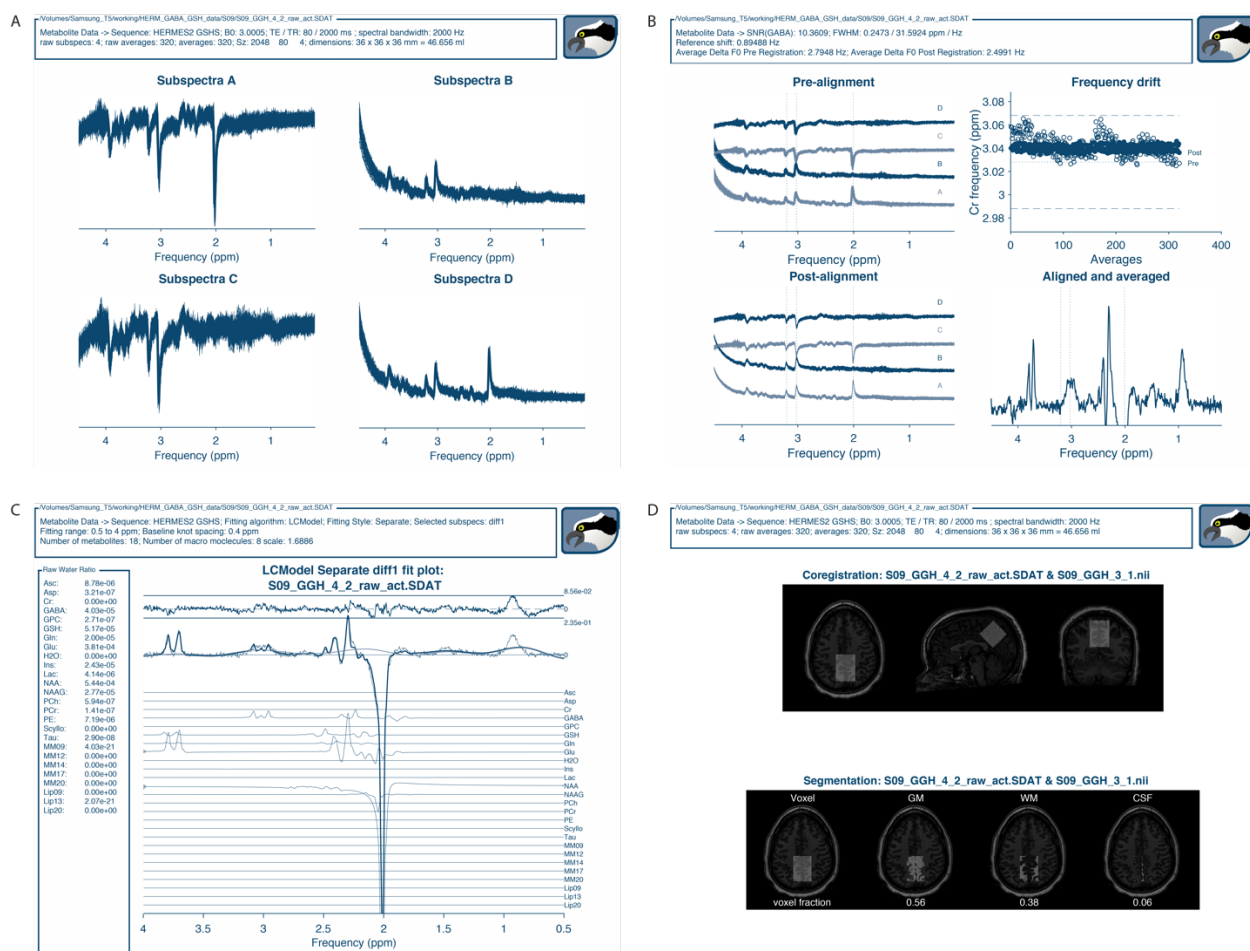

*Figure 6: Osprey visualization of the analysis of a HERMES dataset. (A) 'Load' visualization; (B) 'Proc' visualization with individual transients and frequency drift plot before and after spectral alignment; (C) 'Fit' visualization of the GABA-edited HERMES difference spectrum; (D) 'Coreg' and 'Seg' visualization of voxel coregistration and segmentation, including display of tissue fractions.*

## 4. Discussion

The magnetic resonance spectrum of the human brain is rich with biochemical information, but extracting that information is a challenging task due to the overlapped nature of the metabolite spectra and the broad in-vivo linewidth. Quantitative MRS measurement outcomes are known to vary considerably depending on field strength, scanner vendor, localization technique, acquisition parameters, and choice of data processing and quantification practices. Recently, the MRS community has led efforts to converge towards standardized data acquisition (Deelchand et al.,

2019; Öz et al., 2020; Saleh et al., 2019; Wilson et al., 2019). In contrast, consensus on the processing and analysis of data has been slower to emerge.

The most commonly used strategy for quantitative analysis of MR spectra is linear-combination modelling. As a result of the methodological diversity and lack of standardized processing pipelines, most researchers have developed their own code to prepare their data for third-party quantification software. This practice is problematic for a number of reasons: a) methodological heterogeneity and opacity diminish comparability and reproducibility of quantitative MRS studies; b) benchmarking and subsequent adaptation of methodological progress is considerably slowed down; c) researchers new to the field experience a high-level entry threshold; d) strong dependency on engagement, support, and funding situation of third-party software developers leaves the community vulnerable.

Our new toolkit ‘Osprey’ seeks to address these issues by providing the community with a freely available open-source environment that unifies all steps of modern MRS data analysis – processing, modelling, quantification – into a common framework. Osprey is designed to: a) reduce methodological heterogeneity with its built-in standardized processing pipeline, modelling and quantification routines. These can serve as a substrate and starting point for the development of advanced data analysis methods, such as coil-combination or spectral alignment routines; b) accelerate the benchmarking, critical evaluation and finally integration of improved methods into the modular workflow; c) be immediately deployed by novice MRS users who seek to obtain quantitative results from MRS data using a single software solution, and who lack the resources to develop analysis code of their own; d) reduce the dependency of the MRS community on continued development of third-party linear-combination modelling software. Instead, the model code is directly accessible, modifiable, and exchangeable, allowing the research community to study the factors influencing results of linear-combination modelling, and compare or improve modelling algorithms.

Many other MRI modalities suffer from the same susceptibility to ‘processing bias’, and their communities have developed and adopted de-facto-standardized data processing and analysis toolboxes. Notable examples are, among others, SPM (Friston, 2007) and FSL (Jenkinson et al., 2012) for fMRI analysis, BART (Uecker et al., 2014) for parallel imaging reconstruction, and the Spinal Cord Toolbox (De Leener et al., 2017). In contrast, no such common framework currently

exists for MRS, but rather a diverse field of tools mostly dedicated to modelling or visualization. LCModel continues to be the most widely used spectral analysis tool, despite its current cost of 13300 USD, restrictive licensing, limited ongoing development by a single software engineer, and lack of built-in pre-processing functions. In addition, many parameters and settings that critically affect performance and results of the algorithm remain incompletely understood or documented, most notably the influential ‘DKNTMN’ parameter that determines the degree of spline baseline flexibility (Bhogal et al., 2017; Marjanska and Terpstra, 2019). jMRUI offers basic functions to manipulate spectra and a variety of modelling algorithms (AMARES, QUEST, AQSES), but requires a high degree of user interaction and expertise, making it less suitable for novice researchers and reproducible processing of large datasets. Tarquin supports automated processing, but, like jMRUI, requires pre-processed spectra to model, and leaves a lot of freedom in choosing modelling options to the user. Gannet (Edden et al., 2014) is an open-source toolbox with a similar all-inclusive workflow as Osprey, but is limited to simple peak integration of spectral-edited data. SIVIC (Crane et al., 2013) does not offer data pre-processing or linear-combination modelling at all, and is primarily dedicated to visualizing MRSI data and interfacing with radiological PAC systems. INSPECTOR<sup>4</sup> offers automated analysis, but has not been peer-reviewed and is only distributed as closed-source obfuscated MATLAB executable code, as is the more interactive MRspa<sup>5</sup>.

All these existing software solutions either run as compiled executables or closed-source MATLAB applications, and while the source code is publicly available for some (Tarquin, SIVIC, Vespa), community-sourced modifications are either impossible, or may require substantial modifications downstream and local recompiling. In contrast, the entire Osprey source code (written in MATLAB) is publicly available in a single repository at <https://github.com/schorschinho/osprey>. At the time of writing, Osprey functions are primarily tailored to processing, modelling, and quantifying data from widely used single-voxel <sup>1</sup>H MRS sequences designed to detect common metabolites in the human brain *in-vivo*. The modularity of the pipeline allows developers and users to implement analogous workflows for data acquired with

---

<sup>4</sup> [http://innovation.columbia.edu/technologies/cu17130\\_inspector-magnetic-resonance-spectroscopy-software-for-optimized-data-extraction](http://innovation.columbia.edu/technologies/cu17130_inspector-magnetic-resonance-spectroscopy-software-for-optimized-data-extraction)

<sup>5</sup> <https://www.cmrr.umn.edu/downloads/mrspa/>

different localization techniques, at different field strength, from other nuclei and body parts, animals, or phantoms, simply by branching out the workflow using ‘if’ statements and flags.

The Osprey workflow has been designed to facilitate the development and comparison of processing routines and new linear-combination models. For example, there is currently no consensus linear-combination strategy for GABA-edited MEGA data. Using Osprey, different strategies can be compared, e.g. whether to include macromolecular basis functions and homocarnosine (Deelchand et al., 2019), whether to impose soft constraints (Murdoch and Dydak, 2011), whether to increase baseline stiffness, whether to constrain the model by incorporating fit information from the sum spectrum (Oeltzschner et al., 2019b), etc. Osprey facilitates methodological investigations like these through its job system that allows many datasets to be batch-processed by modifying a single text file. While large-scale repositories of MRS data are still rare, projects like Big GABA (<https://www.nitrc.org/projects/biggaba/>) already provide publicly available datasets that can be easily deployed to benchmark the performance of analysis methods with high statistical power.

## 5. Conclusions

Osprey is a new, open-source software environment for the pre-processing, linear-combination modelling, quantification and visualization of magnetic resonance spectroscopy data. It is hoped that the availability of such a tool will improve the standardization and accessibility of MRS data processing, while enabling further investigation and rapid adoption of new methodology.

## Acknowledgements

This work was supported by NIH grants K99AG062230, R21AG060245, R01EB016089, R01EB023963, and P41EB015909.



## References

- Allen, M., Poggiali, D., Whitaker, K., Marshall, T.R., Kievit, R.A., 2019. Raincloud plots: a multi-platform tool for robust data visualization. *Wellcome Open Res.* 4, 63. <https://doi.org/10.12688/wellcomeopenres.15191.1>
- Barkhuijsen, H., De Beer, R., Van Ormondt, D., 1987. Improved Algorithm for Noniterative Time-Domain Model Fitting to Exponentially Damped Magnetic Resonance Signals. *J. Magn. Reson.* 73, 553–557.
- Bhogal, A.A., Schür, R.R., Houtepen, L.C., van de Bank, B., Boer, V.O., Marsman, A., Barker, P.B., Scheenen, T.W.J., Wijnen, J.P., Vinkers, C.H., Klomp, D.W.J., 2017. 1H-MRS processing parameters affect metabolite quantification: The urgent need for uniform and transparent standardization. *NMR Biomed.* 30, e3804. <https://doi.org/10.1002/nbm.3804>
- Byrd, R.H., Lu, Peihuang., Nocedal, Jorge., Zhu, Ciyu., 1995. A Limited Memory Algorithm for Bound Constrained Optimization. *SIAM J. Sci. Comput.* 16, 1190–1208. <https://doi.org/10.1137/0916069>
- Chan, K.L., Puts, N.A.J., Schär, M., Barker, P.B., Edden, R.A.E., 2016. HERMES: Hadamard encoding and reconstruction of MEGA-edited spectroscopy. *Magn. Reson. Med.* 76, 11–19. <https://doi.org/10.1002/mrm.26233>
- Crane, J.C., Olson, M.P., Nelson, S.J., 2013. SIVIC: Open-Source, Standards-Based Software for DICOM MR Spectroscopy Workflows. *Int. J. Biomed. Imaging* 2013, 12. <https://doi.org/10.1155/2013/169526>
- De Leener, B., Lévy, S., Dupont, S.M., Fonov, V.S., Stikov, N., Louis Collins, D., Callot, V., Cohen-Adad, J., 2017. SCT: Spinal Cord Toolbox, an open-source software for processing spinal cord MRI data. *NeuroImage* 145, 24–43. <https://doi.org/10.1016/j.neuroimage.2016.10.009>
- Deelchand, D.K., Berrington, A., Noeske, R., Joers, J.M., Arani, A., Gillen, J., Schär, M., Nielsen, J.-F., Peltier, S., Seraji-Bozorgzad, N., Landheer, K., Juchem, C., Soher, B.J., Noll, D.C., Kantarci, K., Ratai, E.M., Mareci, T.H., Barker, P.B., Öz, G., 2019. Across-vendor standardization of semi-LASER for single-voxel MRS at 3T. *NMR Biomed.* n/a, e4218. <https://doi.org/10.1002/nbm.4218>
- Deelchand, D.K., Marjańska, M., Henry, P.-G., Terpstra, M., 2019. MEGA-PRESS of GABA+: Influences of acquisition parameters. *NMR Biomed.* n/a, e4199. <https://doi.org/10.1002/nbm.4199>
- Edden, R.A., Intrapirromkul, J., Zhu, H., Cheng, Y., Barker, P.B., 2012. Measuring T2 in vivo with J-difference editing: application to GABA at 3 Tesla. *J Magn Reson Imaging* 35, 229–234. <https://doi.org/10.1002/jmri.22865>
- Edden, R.A., Puts, N.A., Harris, A.D., Barker, P.B., Evans, C.J., 2014. Gannet: A batch-processing tool for the quantitative analysis of gamma-aminobutyric acid-edited MR spectroscopy spectra. *J Magn Reson Imaging* 40, 1445–1452. <https://doi.org/10.1002/jmri.24478>
- Friston, K.J., 2007. *Statistical parametric mapping the analysis of functional brain images.* Elsevier/Academic Press, Amsterdam; Boston.
- Gasparovic, C., Song, T., Devier, D., Bockholt, H.J., Caprihan, A., Mullins, P.G., Posse, S., Jung, R.E., Morrison, L.A., 2006. Use of tissue water as a concentration reference for proton spectroscopic imaging. *Magn. Reson. Med.* 55, 1219–1226. <https://doi.org/10.1002/mrm.20901>
- Hall, E.L., Stephenson, M.C., Price, D., Morris, P.G., 2014. Methodology for improved detection of low concentration metabolites in MRS: Optimised combination of signals from multi-element coil arrays. *NeuroImage* 86, 35–42. <https://doi.org/10.1016/J.NEUROIMAGE.2013.04.077>
- Harris, A.D., Puts, N.A.J., Edden, R.A.E., 2015. Tissue correction for GABA-edited MRS: Considerations of voxel composition, tissue segmentation, and tissue relaxations. *J. Magn. Reson. Imaging* 42. <https://doi.org/10.1002/jmri.24903>

- Harris, A.D., Saleh, M.G., Edden, R.A.E., 2017. Edited <sup>1</sup>H magnetic resonance spectroscopy in vivo: Methods and metabolites. *Magn. Reson. Med.* 77, 1377–1389. <https://doi.org/10.1002/mrm.26619>
- Jenkinson, M., Beckmann, C.F., Behrens, T.E.J., Woolrich, M.W., Smith, S.M., 2012. FSL. *NeuroImage*, 20 YEARS OF fMRI 62, 782–790. <https://doi.org/10.1016/j.neuroimage.2011.09.015>
- Jensen, J.E., deB. Frederick, B., Renshaw, P.F., 2005. Grey and white matter GABA level differences in the human brain using two-dimensional, J-resolved spectroscopic imaging. *NMR Biomed.* 18, 570–576. <https://doi.org/10.1002/nbm.994>
- Klose, U., 1990. In vivo proton spectroscopy in presence of eddy currents. *Magn. Reson. Med.* 14, 26–30. <https://doi.org/10.1002/mrm.1910140104>
- Knight-Scott, J., Haley, A.P., Rossmiller, S.R., Farace, E., Mai, V.M., Christopher, J.M., Manning, C.A., Simnad, V.I., Siragy, H.M., 2003. Molality as a unit of measure for expressing <sup>1</sup>H MRS brain metabolite concentrations in vivo. *Magn. Reson. Imaging* 21, 787–797. [https://doi.org/10.1016/S0730-725X\(03\)00179-6](https://doi.org/10.1016/S0730-725X(03)00179-6)
- Landheer, K., Schulte, R.F., Treacy, M.S., Swanberg, K.M., Juchem, C., 2019. Theoretical description of modern (<sup>1</sup>H) in Vivo magnetic resonance spectroscopic pulse sequences. *J Magn Reson Imaging*. <https://doi.org/10.1002/jmri.26846>
- Levenberg, K., 1944. A method for the solution of certain non-linear problems in least squares. *Q. Appl. Math.* 2, 164–168. <https://doi.org/10.1090/qam/10666>
- Marjanska, M., Terpstra, M., 2019. Influence of fitting approaches in LCModel on MRS quantification focusing on age-specific macromolecules and the spline baseline. *NMR Biomed* e4197. <https://doi.org/10.1002/nbm.4197>
- Marquardt, D.W., 1963. An Algorithm for Least-Squares Estimation of Nonlinear Parameters. *J. Soc. Ind. Appl. Math.* 11, 431–441. <https://doi.org/10.1137/0111030>
- Mescher, M., Merkle, H., Kirsch, J., Garwood, M., Gruetter, R., 1998. Simultaneous in vivo spectral editing and water suppression. *NMR Biomed.* 11, 266–272. [https://doi.org/10.1002/\(SICI\)1099-1492\(199810\)11:6<266::AID-NBM530>3.0.CO;2-J](https://doi.org/10.1002/(SICI)1099-1492(199810)11:6<266::AID-NBM530>3.0.CO;2-J)
- Mikkelsen, M., Barker, P.B., Bhattacharyya, P.K., Brix, M.K., Buur, P.F., Cecil, K.M., Chan, K.L., Chen, D.Y.-T., Craven, A.R., Cuypers, K., Dacko, M., Duncan, N.W., Dydak, U., Edmondson, D.A., Ende, G., Ersland, L., Gao, F., Greenhouse, I., Harris, A.D., He, N., Heba, S., Hoggard, N., Hsu, T.-W., Jansen, J.F.A., Kangarlu, A., Lange, T., Lebel, R.M., Li, Y., Lin, C.-Y.E., Liou, J.-K., Lirng, J.-F., Liu, F., Ma, R., Maes, C., Moreno-Ortega, M., Murray, S.O., Noah, S., Noeske, R., Noseworthy, M.D., Oeltzschner, G., Prisciandaro, J.J., Puts, N.A.J., Roberts, T.P.L., Sack, M., Sailasuta, N., Saleh, M.G., Schallmo, M.-P., Simard, N., Swinnen, S.P., Tegenthoff, M., Truong, P., Wang, G., Wilkinson, I.D., Wittsack, H.-J., Xu, H., Yan, F., Zhang, C., Zipunnikov, V., Zöllner, H.J., Edden, R.A.E., 2017. Big GABA: Edited MR spectroscopy at 24 research sites. *NeuroImage* 159, 32–45. <https://doi.org/10.1016/j.neuroimage.2017.07.021>
- Mikkelsen, M., Rimbault, D.L., Barker, P.B., Bhattacharyya, P.K., Brix, M.K., Buur, P.F., Cecil, K.M., Chan, K.L., Chen, D.Y., Craven, A.R., Cuypers, K., Dacko, M., Duncan, N.W., Dydak, U., Edmondson, D.A., Ende, G., Ersland, L., Forbes, M.A., Gao, F., Greenhouse, I., Harris, A.D., He, N., Heba, S., Hoggard, N., Hsu, T.W., Jansen, J.F.A., Kangarlu, A., Lange, T., Lebel, R.M., Li, Y., Lin, C.E., Liou, J.K., Lirng, J.F., Liu, F., Long, J.R., Ma, R., Maes, C., Moreno-Ortega, M., Murray, S.O., Noah, S., Noeske, R., Noseworthy, M.D., Oeltzschner, G., Porges, E.C., Prisciandaro, J.J., Puts, N.A.J., Roberts, T.P.L., Sack, M., Sailasuta, N., Saleh, M.G., Schallmo, M.P., Simard, N., Stoffers, D., Swinnen, S.P., Tegenthoff, M., Truong, P., Wang, G., Wilkinson, I.D., Wittsack, H.J., Woods, A.J., Xu, H., Yan, F., Zhang, C., Zipunnikov, V., Zollner, H.J., Edden, R.A.E., 2019. Big GABA II: Water-referenced edited MR spectroscopy at 25 research sites. *Neuroimage* 191, 537–548. <https://doi.org/10.1016/j.neuroimage.2019.02.059>
- Mlynárik, V., Gruber, S., Moser, E., 2001. Proton T1 and T2 relaxation times of human brain metabolites at 3 Tesla. *NMR Biomed.* 14, 325–331. <https://doi.org/10.1002/nbm.713>



- Murdoch, J.B., Dydak, U., 2011. Modeling MEGA-PRESS macromolecules for a better grasp of GABA, in: Proc. Intl. Soc. Magn. Reson. Med. Presented at the Intl. Soc. Magn. Reson. Med., Montreal, p. 1394.
- Near, J., Edden, R., Evans, C.J., Paquin, R., Harris, A., Jezzard, P., 2015. Frequency and phase drift correction of magnetic resonance spectroscopy data by spectral registration in the time domain. *Magn. Reson. Med.* 73, 44–50. <https://doi.org/10.1002/mrm.25094>
- Oeltzschner, G., Saleh, M.G., Rimbault, D., Mikkelsen, M., Chan, K.L., Puts, N.A.J., Edden, R.A.E., 2019a. Advanced Hadamard-encoded editing of seven low-concentration brain metabolites: Principles of HERCULES. *NeuroImage* 185, 181–190. <https://doi.org/10.1016/J.NEUROIMAGE.2018.10.002>
- Oeltzschner, G., Zupan, G., Edden, R.A.E., 2019b. Simultaneous linear-combination modeling of MEGA-PRESS sum and difference spectra without soft constraints, in: Proc. Intl. Soc. Magn. Reson. Med. Presented at the Intl. Soc. Magn. Reson. Med., Montreal, p. 510.
- Öz, G., Deelchand, D.K., Wijnen, J.P., Mlynárik, V., Xin, L., Mekle, R., Noeske, R., Scheenen, T.W.J., Tkáč, I., 2020. Advanced single voxel 1H magnetic resonance spectroscopy techniques in humans: Experts' consensus recommendations. *NMR Biomed.* n/a, e4236. <https://doi.org/10.1002/nbm.4236>
- Pouillet, J.-B., Sima, D.M., Simonetti, A.W., Neuter, B.D., Vanhamme, L., Lemmerling, P., Huffel, S.V., 2007. An automated quantitation of short echo time MRS spectra in an open source software environment: AQSES. *NMR Biomed.* 20, 493–504. <https://doi.org/10.1002/nbm.1112>
- Provencher, S.W., 1993. Estimation of metabolite concentrations from localized in vivo proton NMR spectra. *Magn. Reson. Med.* 30, 672–9.
- Puts, N.A.J., Barker, P.B., Edden, R.A.E., 2013. Measuring the longitudinal relaxation time of GABA in vivo at 3 tesla. *J. Magn. Reson. Imaging* 37, 999–1003. <https://doi.org/10.1002/jmri.23817>
- Rothman, D.L., Petroff, O.A., Behar, K.L., Mattson, R.H., 1993. Localized 1H NMR measurements of gamma-aminobutyric acid in human brain in vivo. *Proc. Natl. Acad. Sci. U. S. A.* 90, 5662–5666.
- Saleh, M.G., Oeltzschner, G., Chan, K.L., Puts, N.A.J., Mikkelsen, M., Sch??r, M., Harris, A.D., Edden, R.A.E., 2016. Simultaneous edited MRS of GABA and glutathione. *NeuroImage* 142, 576–582. <https://doi.org/10.1016/j.neuroimage.2016.07.056>
- Saleh, M.G., Rimbault, D., Mikkelsen, M., Oeltzschner, G., Wang, A.M., Jiang, D., Alhamud, A., Near, J., Schär, M., Noeske, R., Murdoch, J.B., Erslund, L., Craven, A.R., Dwyer, G.E., Grüner, E.R., Pan, L., Ahn, S., Edden, R.A.E., 2019. Multi-vendor standardized sequence for edited magnetic resonance spectroscopy. *NeuroImage* 189, 425–431. <https://doi.org/10.1016/j.neuroimage.2019.01.056>
- Simpson, R., Devenyi, G.A., Jezzard, P., Hennessy, T.J., Near, J., 2017. Advanced processing and simulation of MRS data using the FID appliance (FID-A)-An open source, MATLAB-based toolkit. *Magn. Reson. Med.* 77, 23–33. <https://doi.org/10.1002/mrm.26091>
- Stefan, D., Cesare, F.D., Andrasescu, A., Popa, E., Lazariu, A., Vescovo, E., Strbak, O., Williams, S., Starcuk, Z., Cabanas, M., Ormond, D. van, Graveron-Demilly, D., 2009. Quantitation of magnetic resonance spectroscopy signals: the jMRUI software package. *Meas. Sci. Technol.* 20, 104035. <https://doi.org/10.1088/0957-0233/20/10/104035>
- Uecker, M., Lai, P., Murphy, M.J., Virtue, P., Elad, M., Pauly, J.M., Vasanawala, S.S., Lustig, M., 2014. ESPIRiT—an eigenvalue approach to autocalibrating parallel MRI: Where SENSE meets GRAPPA. *Magn. Reson. Med.* 71, 990–1001. <https://doi.org/10.1002/mrm.24751>
- Wansapura, J.P., Holland, S.K., Dunn, R.S., Ball, W.S., 1999. NMR relaxation times in the human brain at 3.0 tesla. *J. Magn. Reson. Imaging* 9, 531–538. [https://doi.org/10.1002/\(SICI\)1522-2586\(199904\)9:4<531::AID-JMRI4>3.0.CO;2-L](https://doi.org/10.1002/(SICI)1522-2586(199904)9:4<531::AID-JMRI4>3.0.CO;2-L)
- Whitaker, K., Rhys-Marshall, T., van Mourik, T., Martinez, P., Poggiali, D., Ye, H., Klug, M., 2019. RainCloudPlots/RainCloudPlots: WellcomeOpenResearch. Zenodo. <https://doi.org/10.5281/zenodo.3368186>

- Wilson, M., Andronesi, O., Barker, P.B., Bartha, R., Bizzi, A., Bolan, P.J., Brindle, K.M., Choi, I., Cudalbu, C., Dydak, U., Emir, U.E., Gonzalez, R.G., Gruber, S., Gruetter, R., Gupta, R.K., Heerschap, A., Henning, A., Hetherington, H.P., Huppi, P.S., Hurd, R.E., Kantarci, K., Kauppinen, R.A., Klomp, D.W.J., Kreis, R., Kruiskamp, M.J., Leach, M.O., Lin, A.P., Luijten, P.R., Marjańska, M., Maudsley, A.A., Meyerhoff, D.J., Mountford, C.E., Mullins, P.G., Murdoch, J.B., Nelson, S.J., Noeske, R., Öz, G., Pan, J.W., Peet, A.C., Poptani, H., Posse, S., Ratai, E., Salibi, N., Scheenen, T.W.J., Smith, I.C.P., Soher, B.J., Tkáč, I., Vigneron, D.B., Howe, F.A., 2019. Methodological consensus on clinical proton MRS of the brain: Review and recommendations. *Magn. Reson. Med.* 82, 527–550. <https://doi.org/10.1002/mrm.27742>
- Wilson, M., Reynolds, G., Kauppinen, R.A., Arvanitis, T.N., Peet, A.C., 2011. A constrained least-squares approach to the automated quantitation of in vivo <sup>1</sup>H magnetic resonance spectroscopy data. *Magn. Reson. Med.* 65, 1–12. <https://doi.org/10.1002/mrm.22579>
- Wyss, P.O., Bianchini, C., Scheidegger, M., Giapitzakis, I.A., Hock, A., Fuchs, A., Henning, A., 2018. In vivo estimation of transverse relaxation time constant ( $T_2$ ) of 17 human brain metabolites at 3T. *Magn. Reson. Med.* <https://doi.org/10.1002/mrm.27067>
- Zhang, Y., An, L., Shen, J., 2017. Fast computation of full density matrix of multispin systems for spatially localized in vivo magnetic resonance spectroscopy. *Med. Phys.* 44, 4169–4178. <https://doi.org/10.1002/mp.12375>
- Zhu, C., Byrd, R.H., Lu, P., Nocedal, J., 1997. Algorithm 778: L-BFGS-B: Fortran subroutines for large-scale bound-constrained optimization. *ACM Trans. Math. Softw. TOMS* 23, 550–560. <https://doi.org/10.1145/279232.279236>

Job

Load

Proc

Fit

Coreg

Seg

Quant

MRS data files  
Metabolite data

MRS data files  
Water data

Structural images  
(NIfTI)

Processing options  
Fit settings

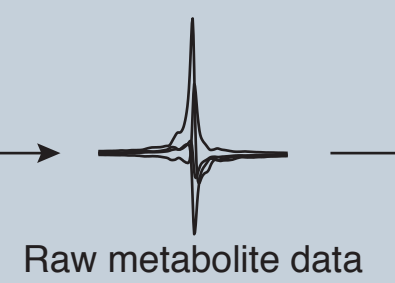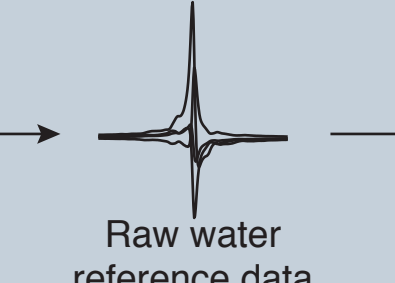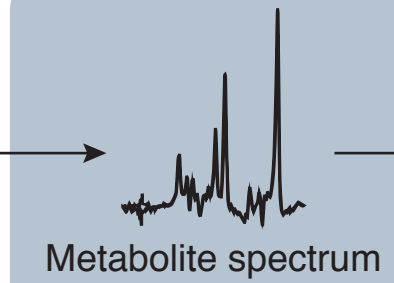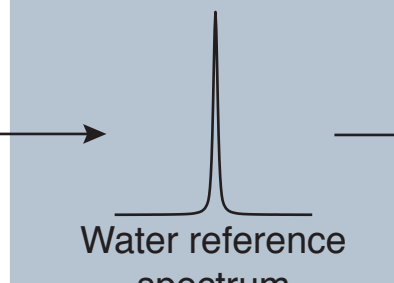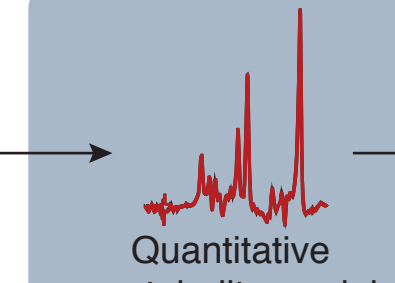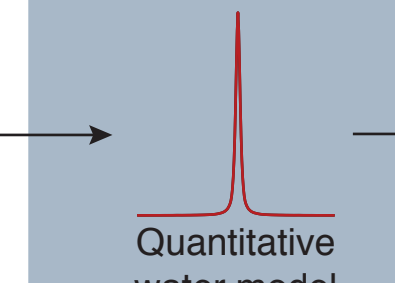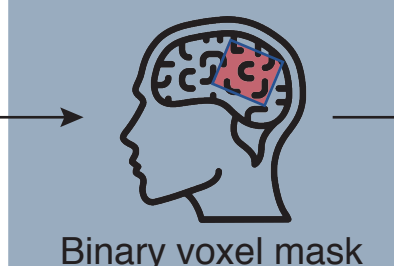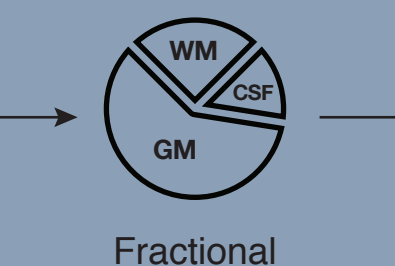

$tCr$   
Creatine ratios

$H_2O$   
Water ratios

CSF  
CSF-corrected

$T_1 T_2$   
Tissue/relaxation-corrected

A

## ALL SPECTRA

bioRxiv preprint doi: <https://doi.org/10.1101/2020.02.12.944207>; this version posted February 12, 2020. The copyright holder for this preprint (which was not certified by peer review) is the author/funder. All rights reserved. No reuse allowed without permission.

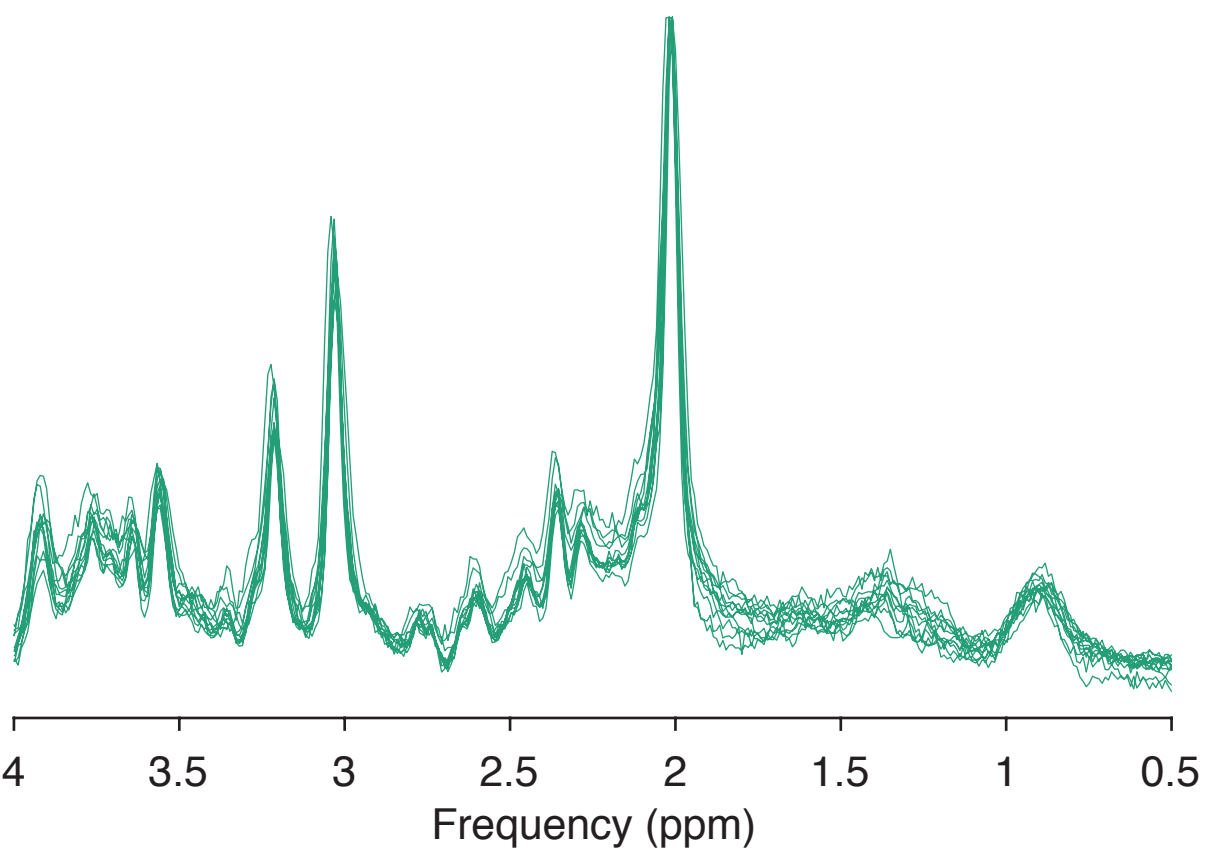

B

## MEAN SPECTRA + MEAN FIT

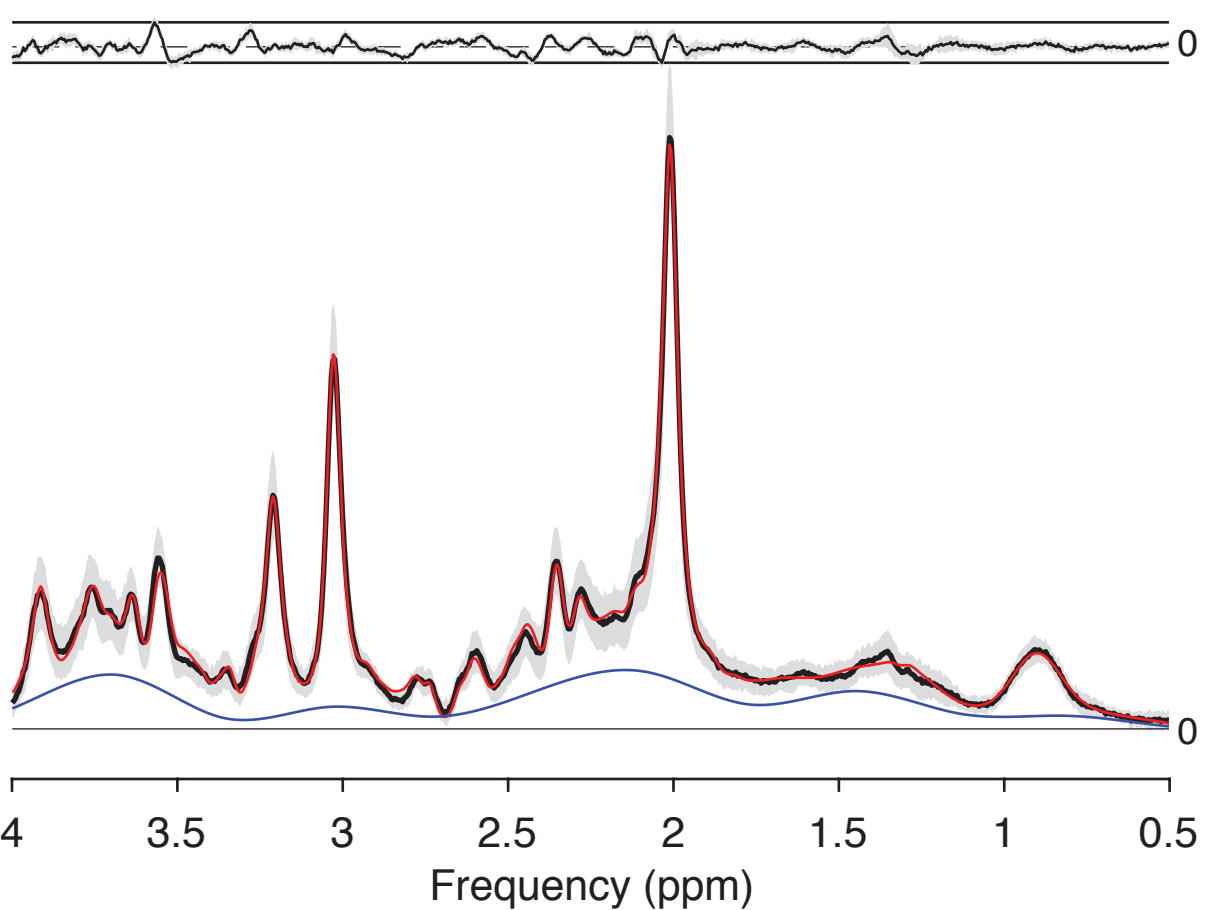

C

## INDIVIDUAL FIT

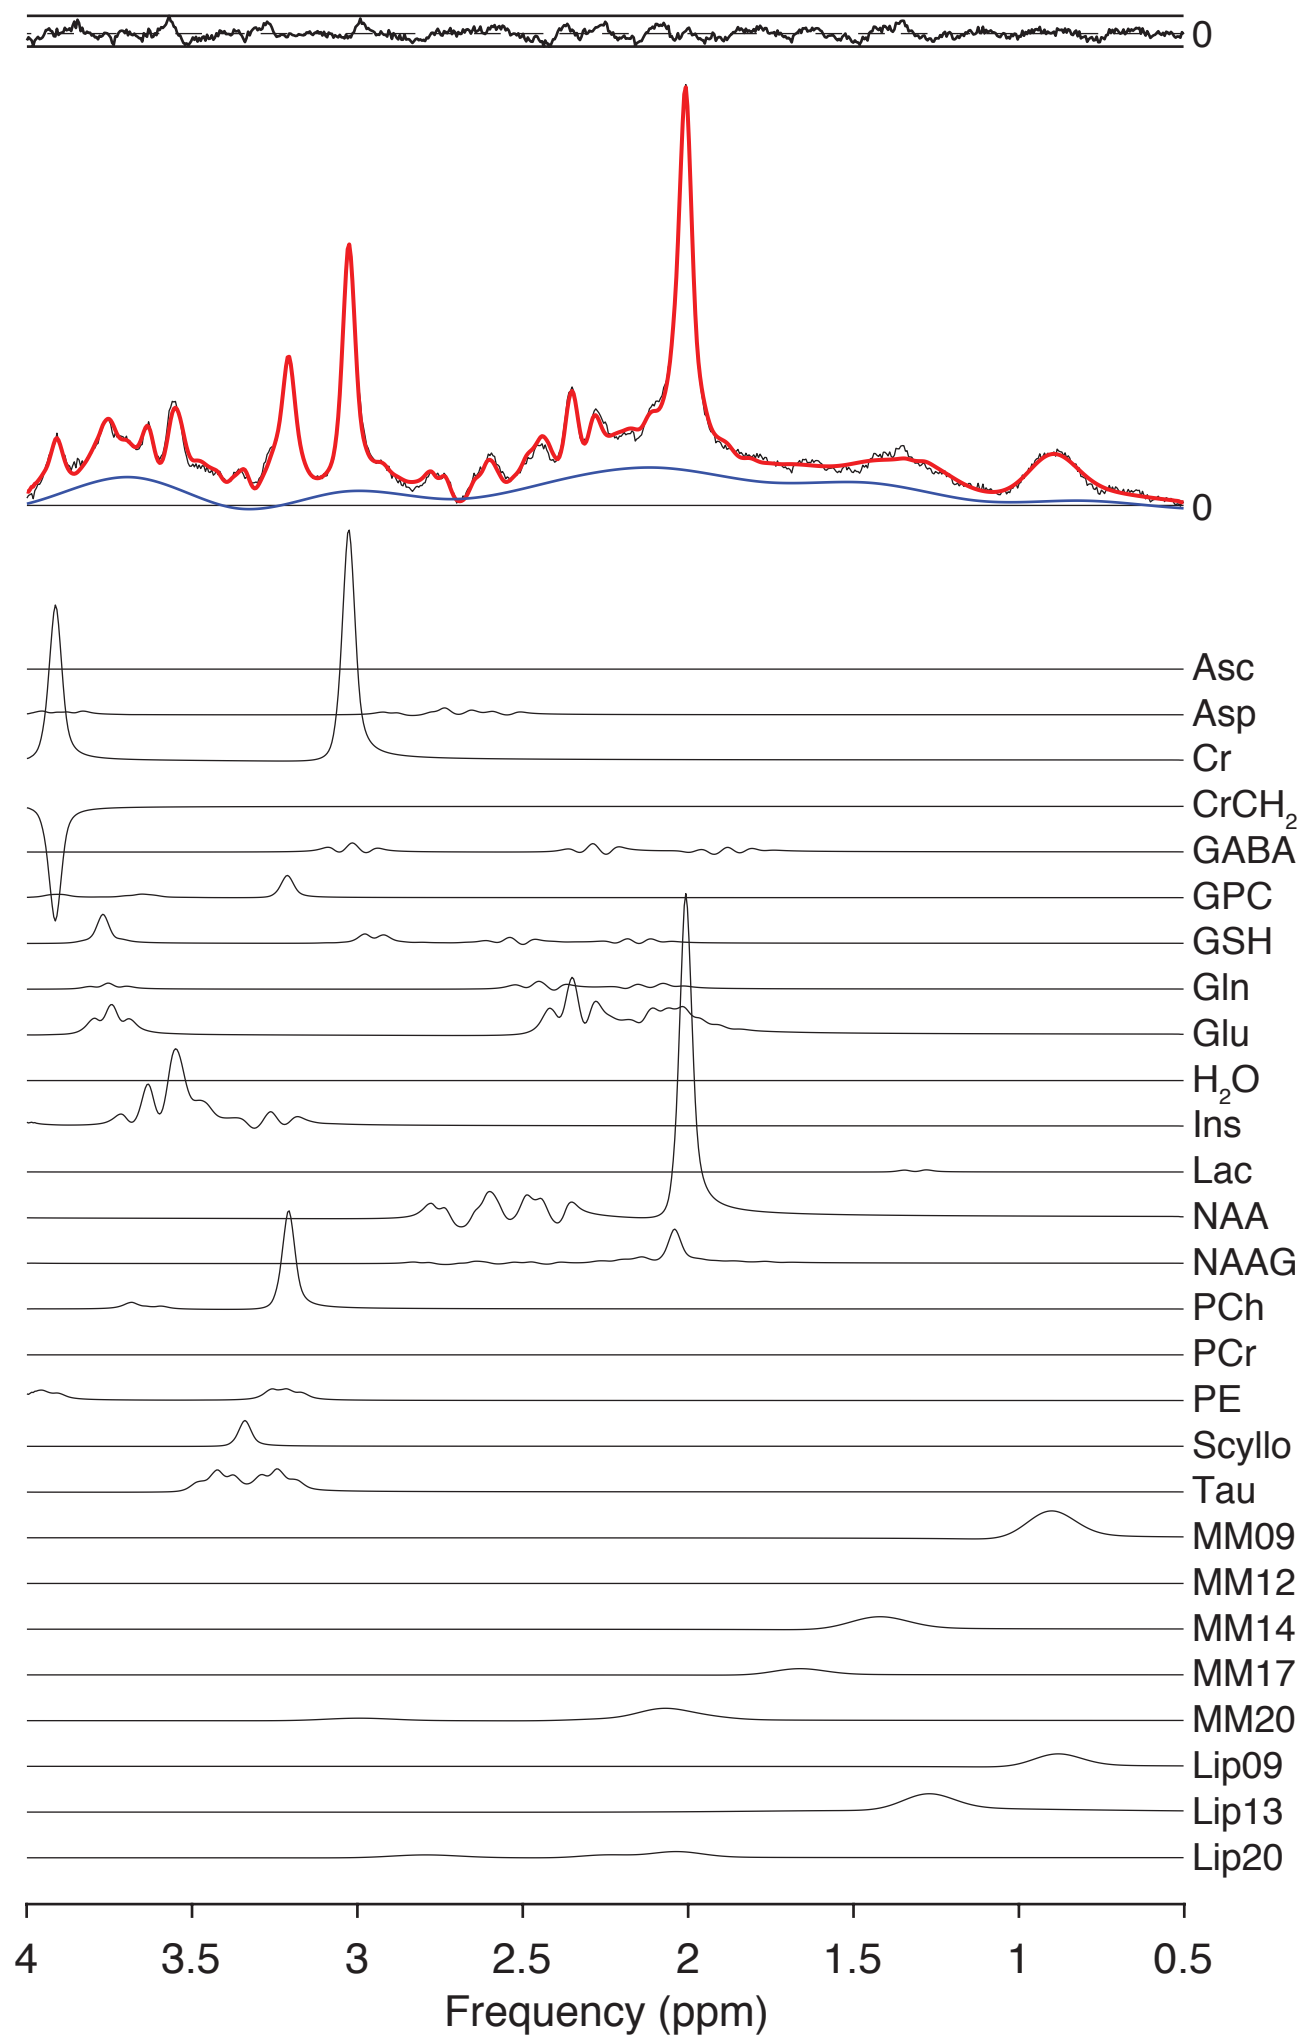

A

## ALL SPECTRA

bioRxiv preprint doi: <https://doi.org/10.1101/2020.02.12.944207>; this version posted February 12, 2020. The copyright holder for this preprint (which was not certified by peer review) is the author/funder. All rights reserved. No reuse allowed without permission.

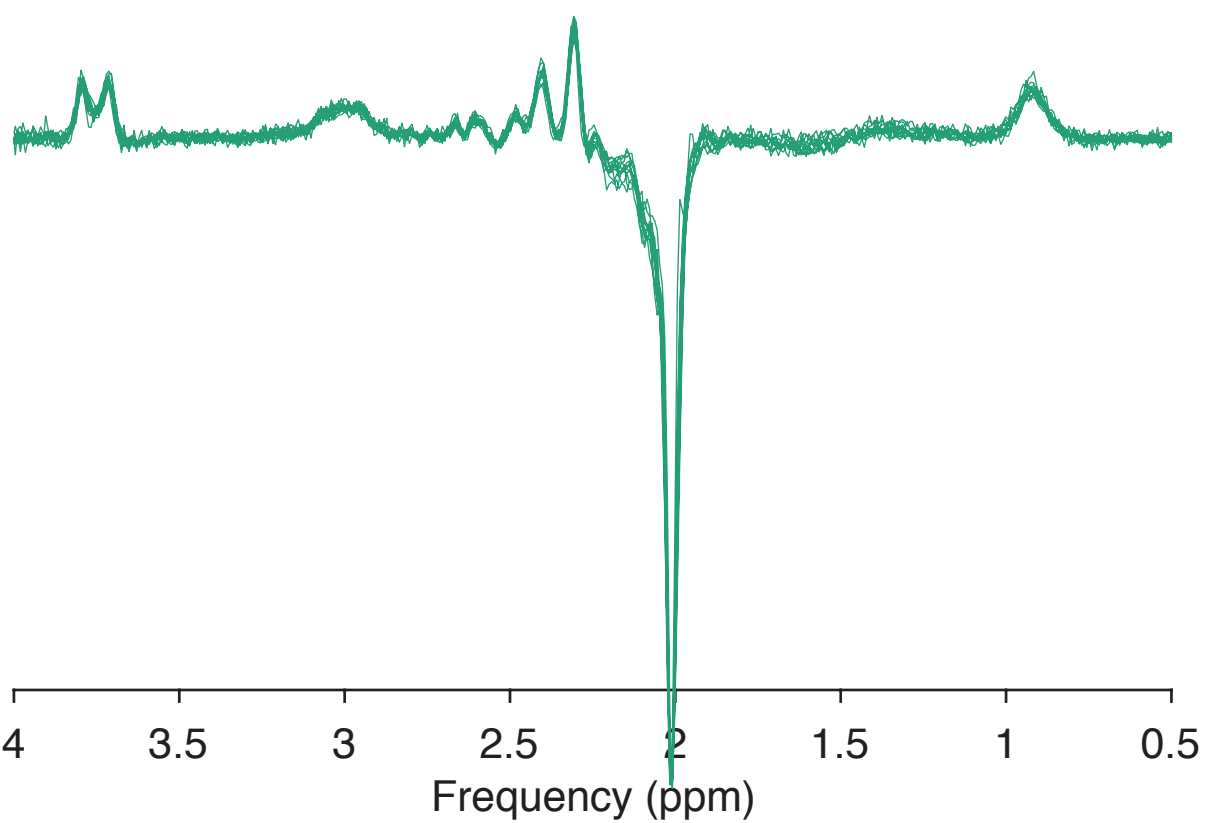

B

## MEAN SPECTRA + MEAN FIT

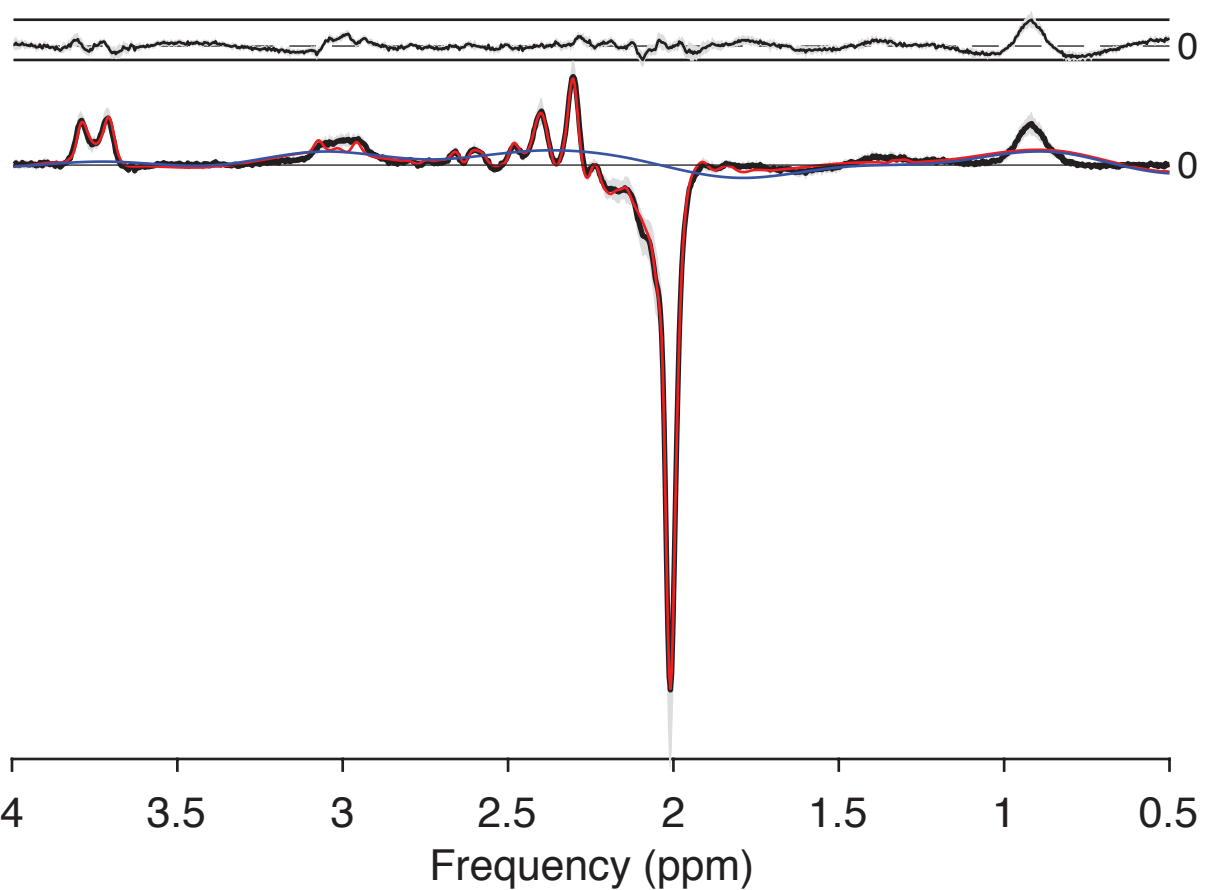

C

## INDIVIDUAL FIT

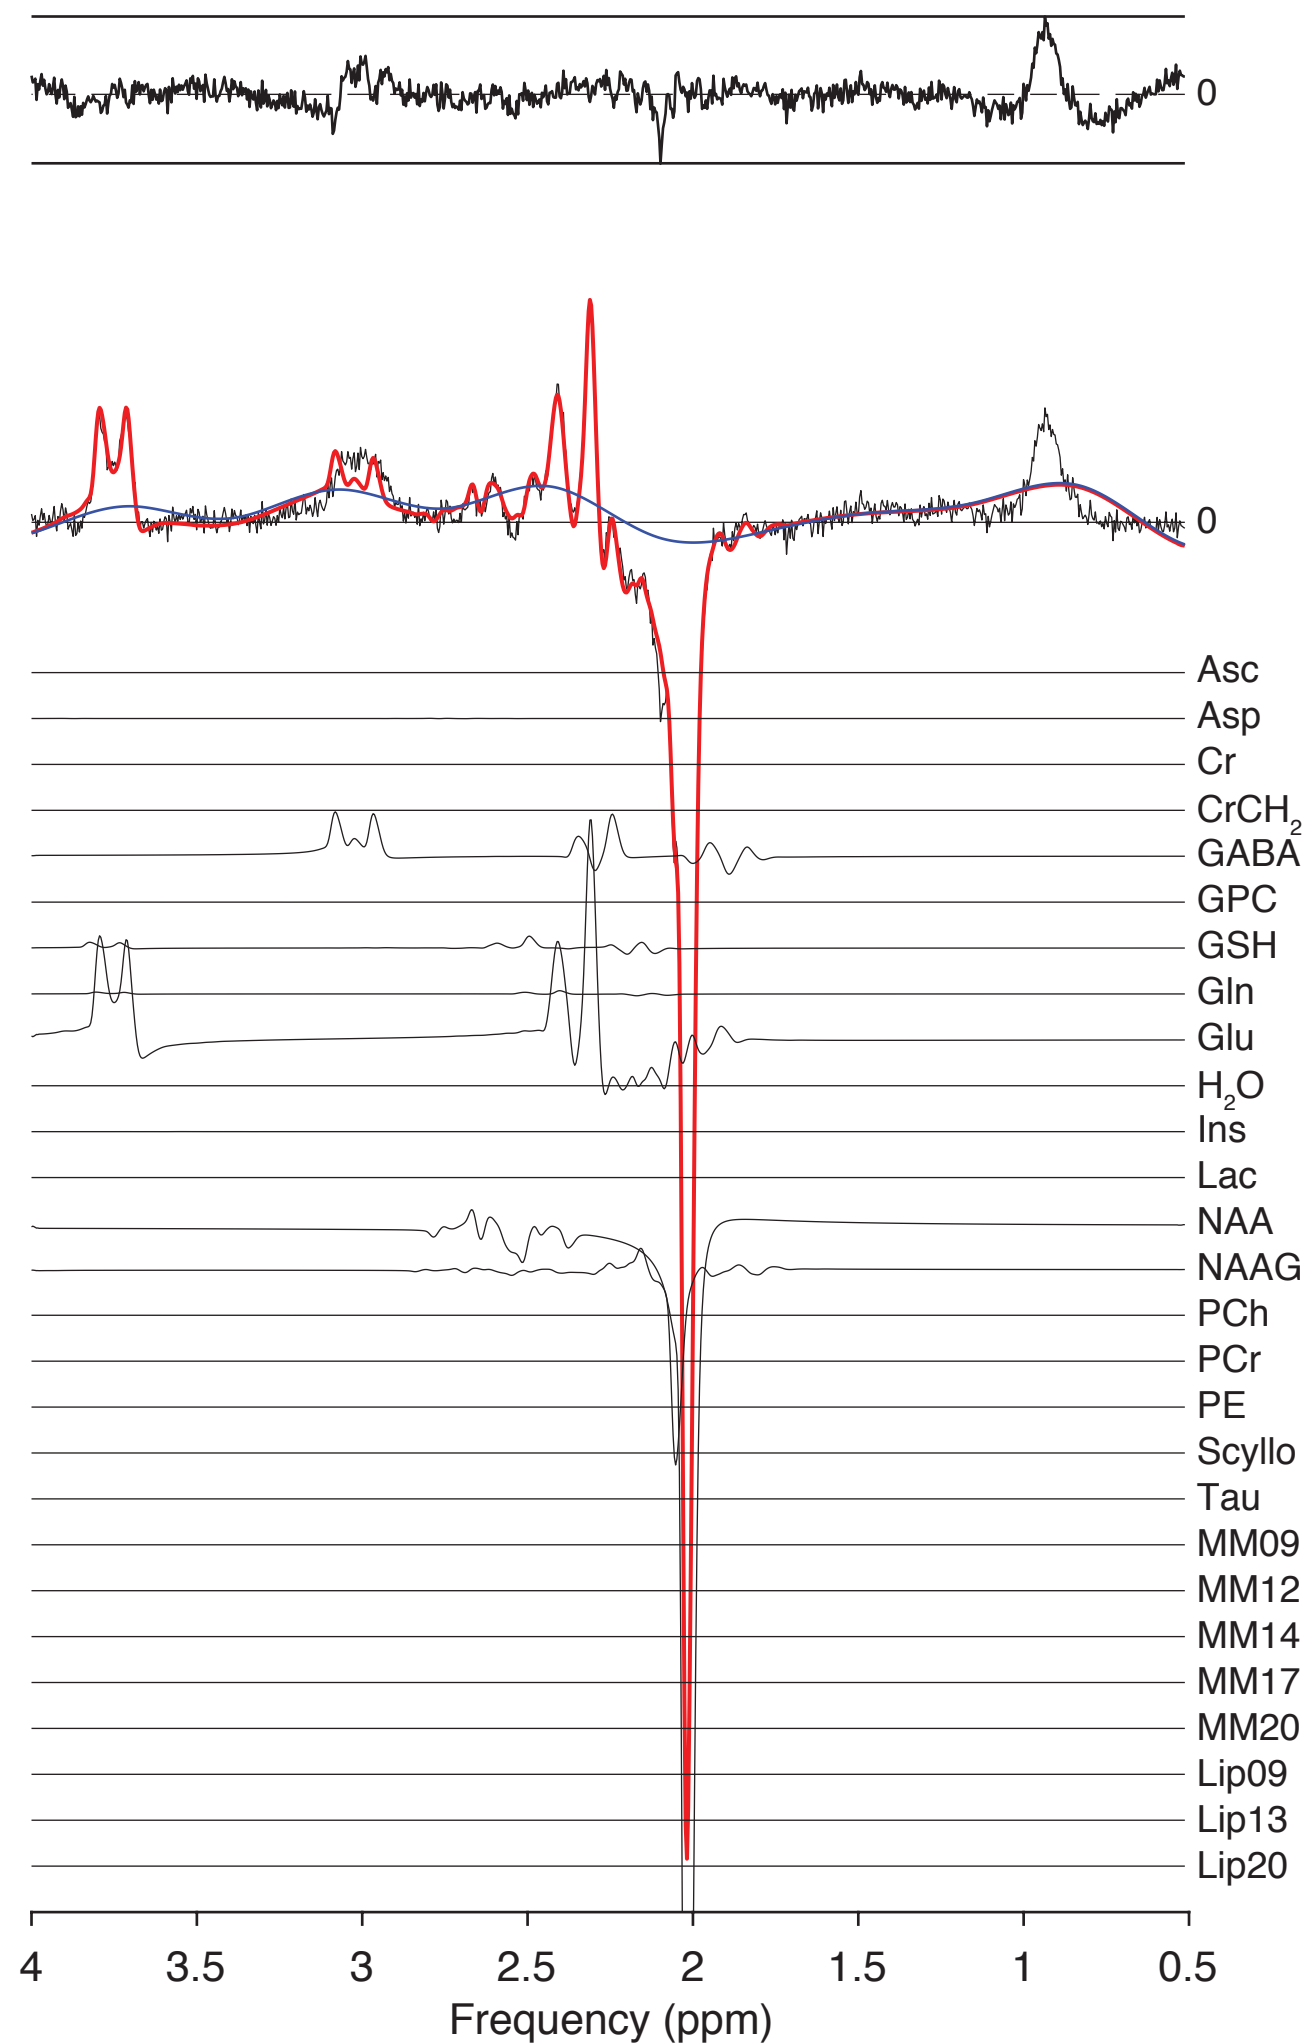

A

## ALL SPECTRA

bioRxiv preprint doi: <https://doi.org/10.1101/2020.02.12.944207>; this version posted February 12, 2020. The copyright holder for this preprint (which was not certified by peer review) is the author/funder. All rights reserved. No reuse allowed without permission.

## GABA-edited

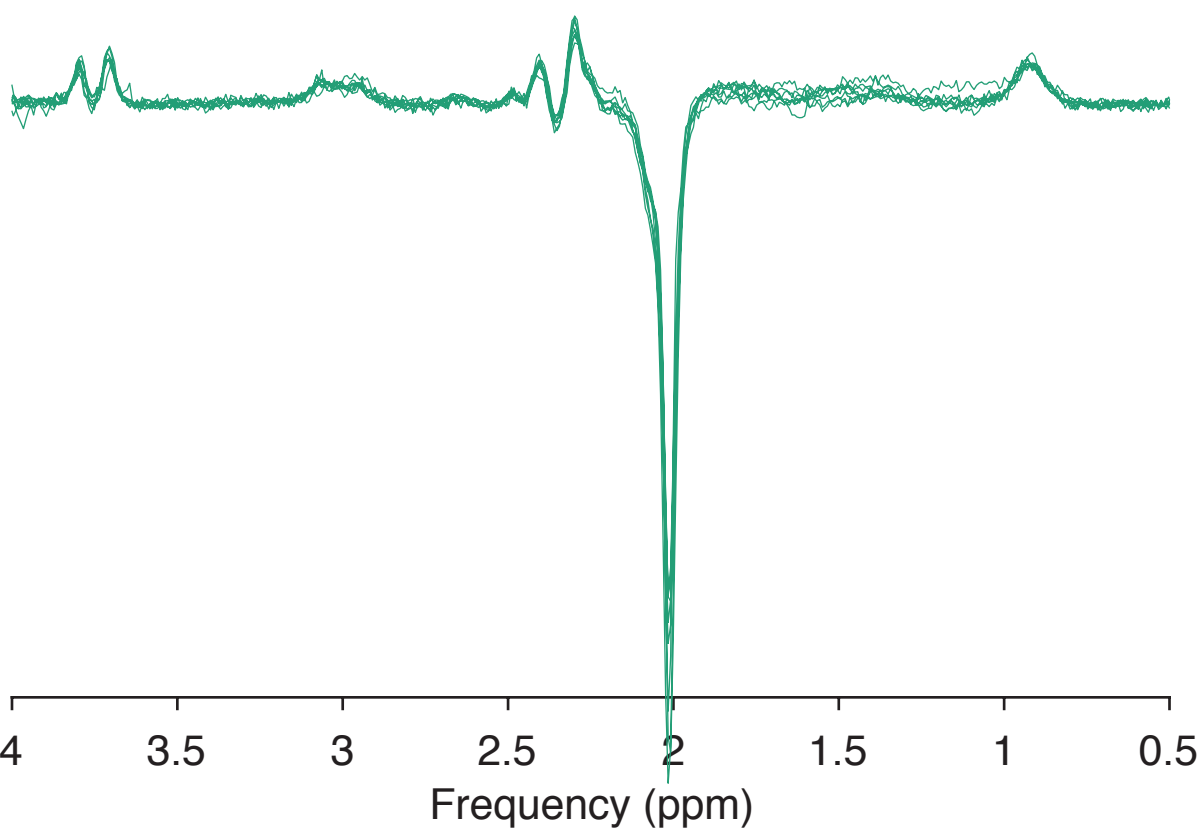

## GSH-edited

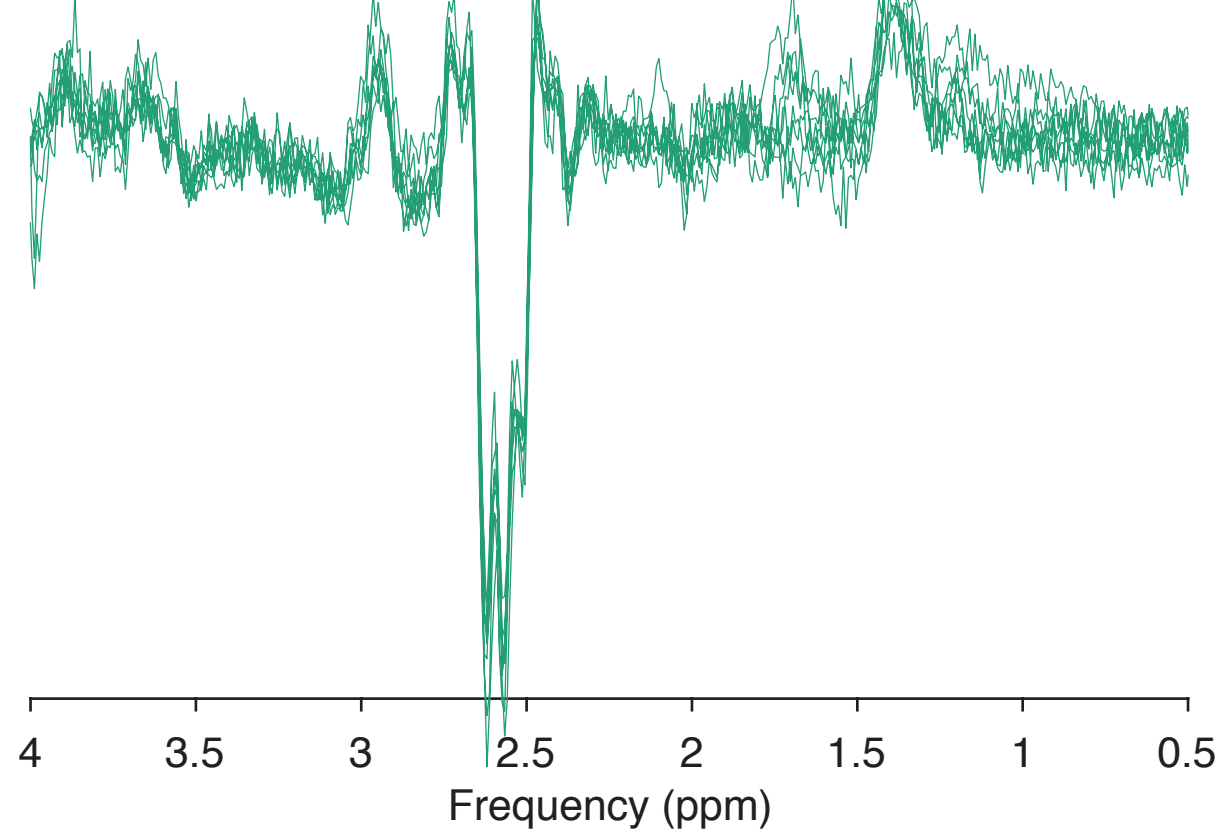

B

## MEAN SPECTRA + MEAN FIT

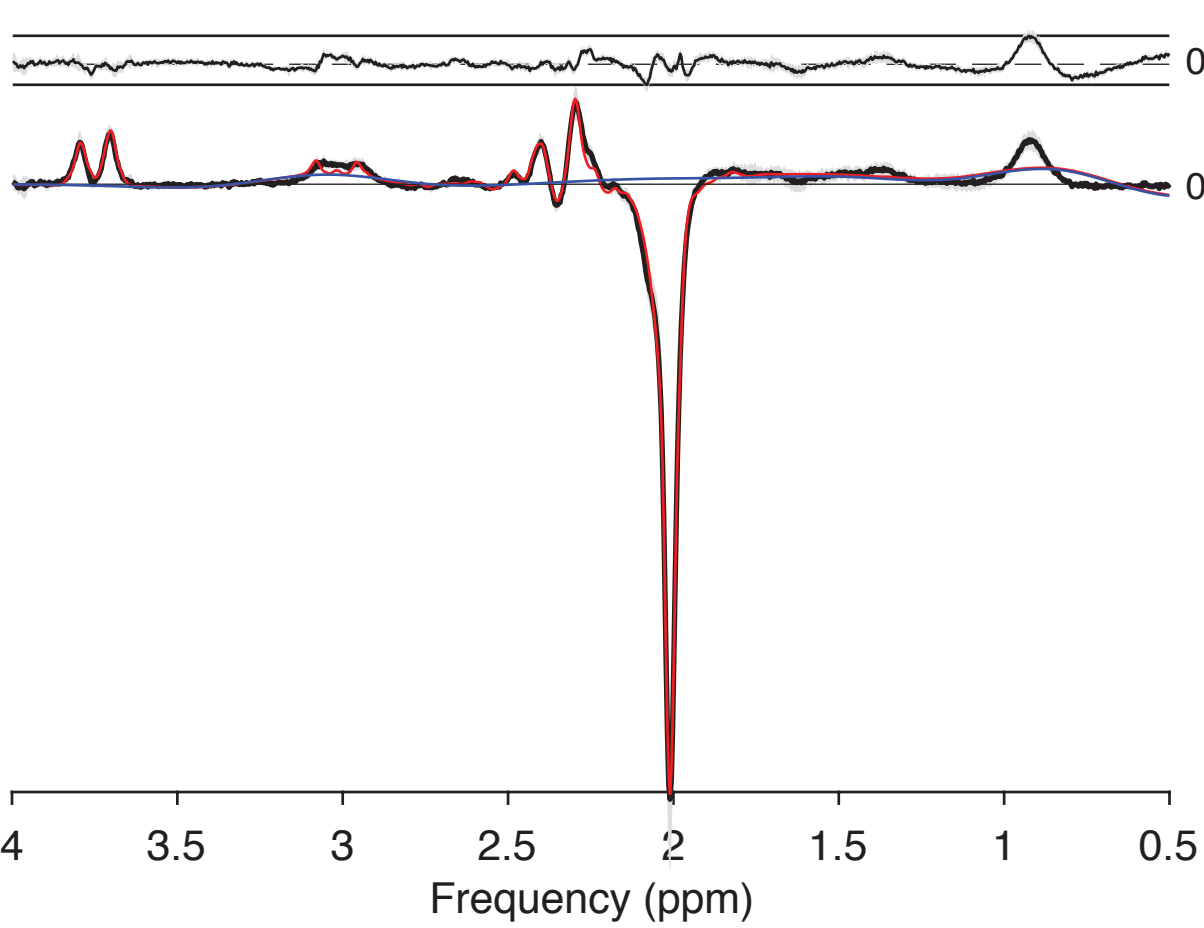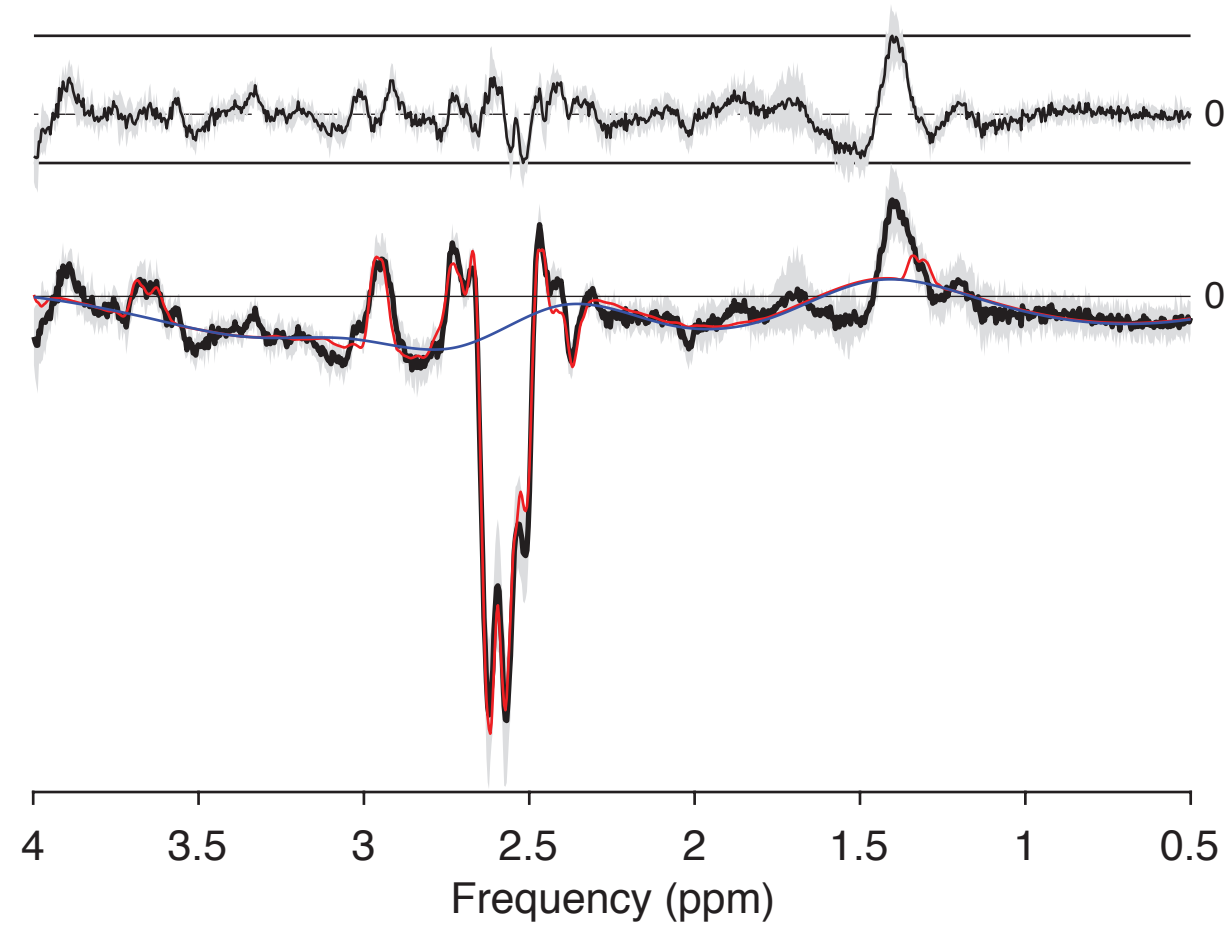

C

## INDIVIDUAL FIT

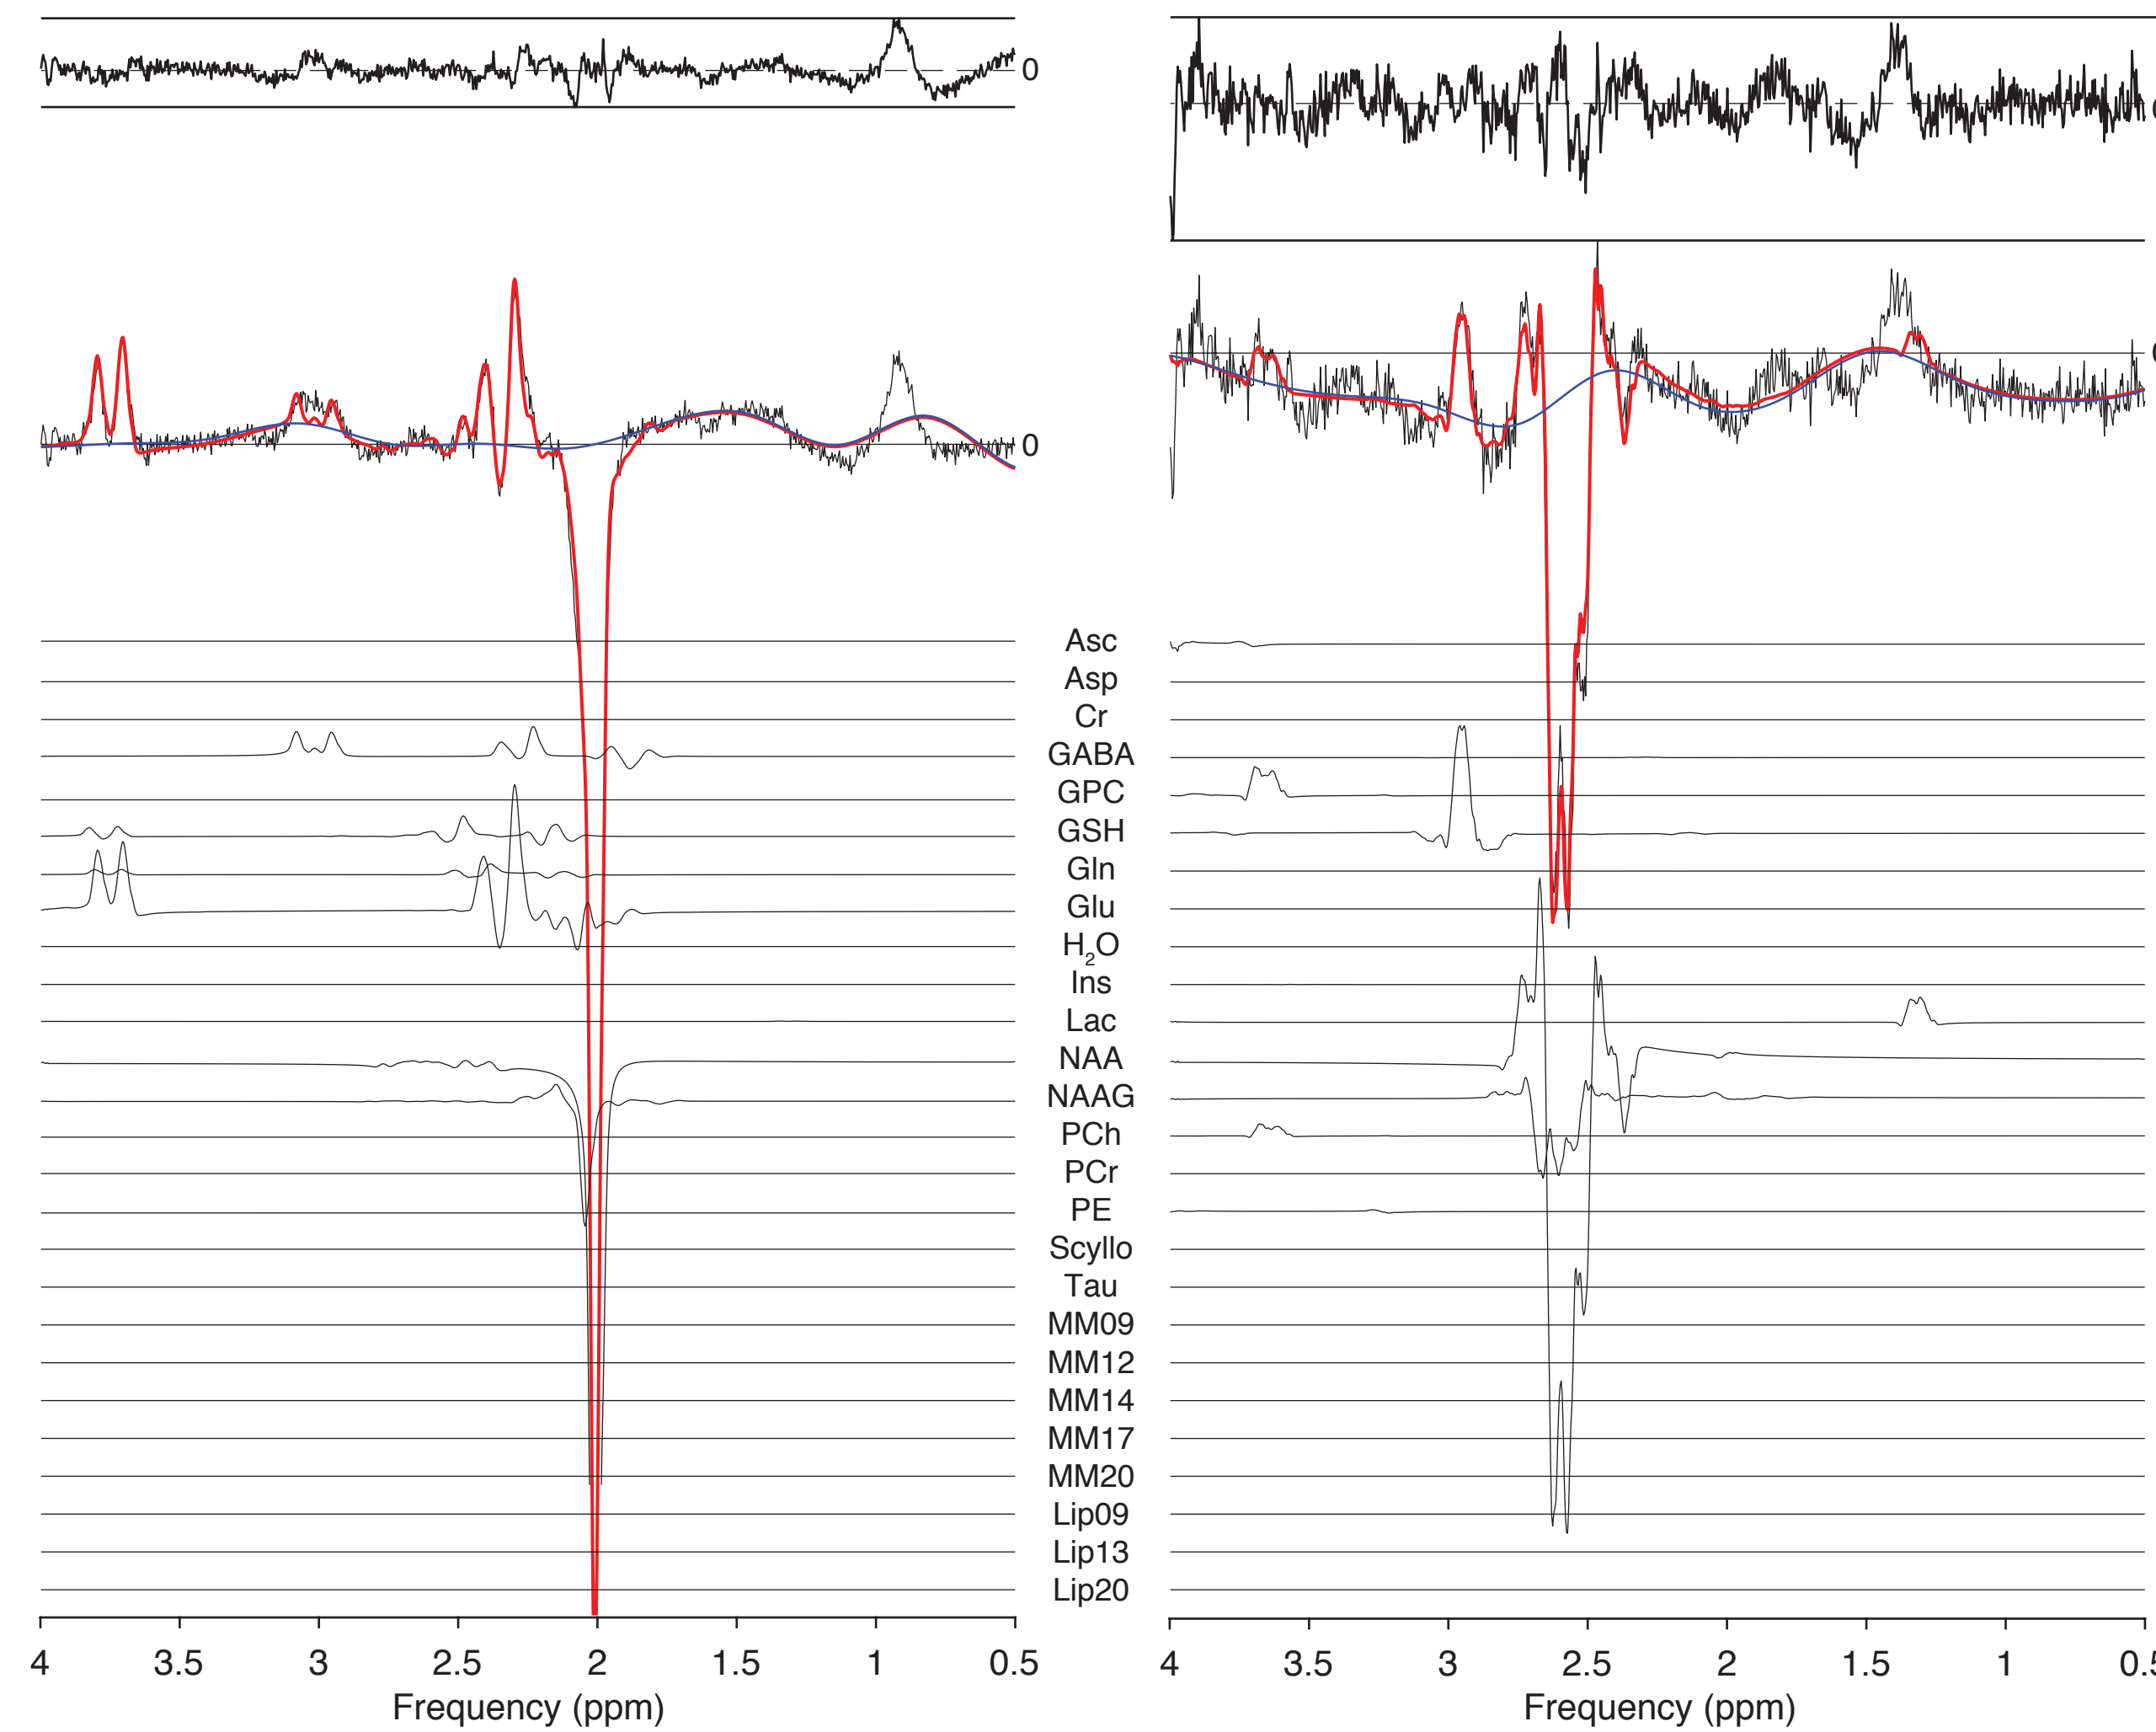



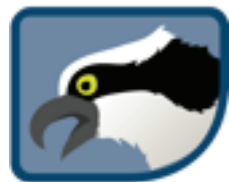

PubMed

GitHub

Raw

Processed

Fit

Cor/Seg

Quantified

Overview

Actual file: /Volumes/Samsung\_T5/working/HERM\_GABA\_GSH\_data/S01/S01\_GGH\_4\_2\_raw\_act.SDAT

Metabolite Data -> SNR(GABA): 12.6361; FWHM: 0.26601 / 33.983 ppm / Hz

Reference shift: 2.3593 Hz

Average Delta F0 Pre Registration: 3.976 Hz; Average Delta F0 Post Registration: 4.0117 Hz

Save

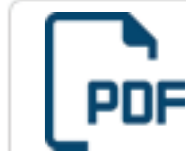

Load data

Process data

bioRxiv preprint doi: <https://doi.org/10.1101/2020.02.12.944207>; this version posted February 12, 2020. The copyright holder for this preprint (which was not certified by peer review) is the author/funder. All rights reserved. No reuse allowed without permission.

Fit data

CoRegister

Segment

Quantify

DelIdentify

Save MRSCont

Exit

### Pre-alignment

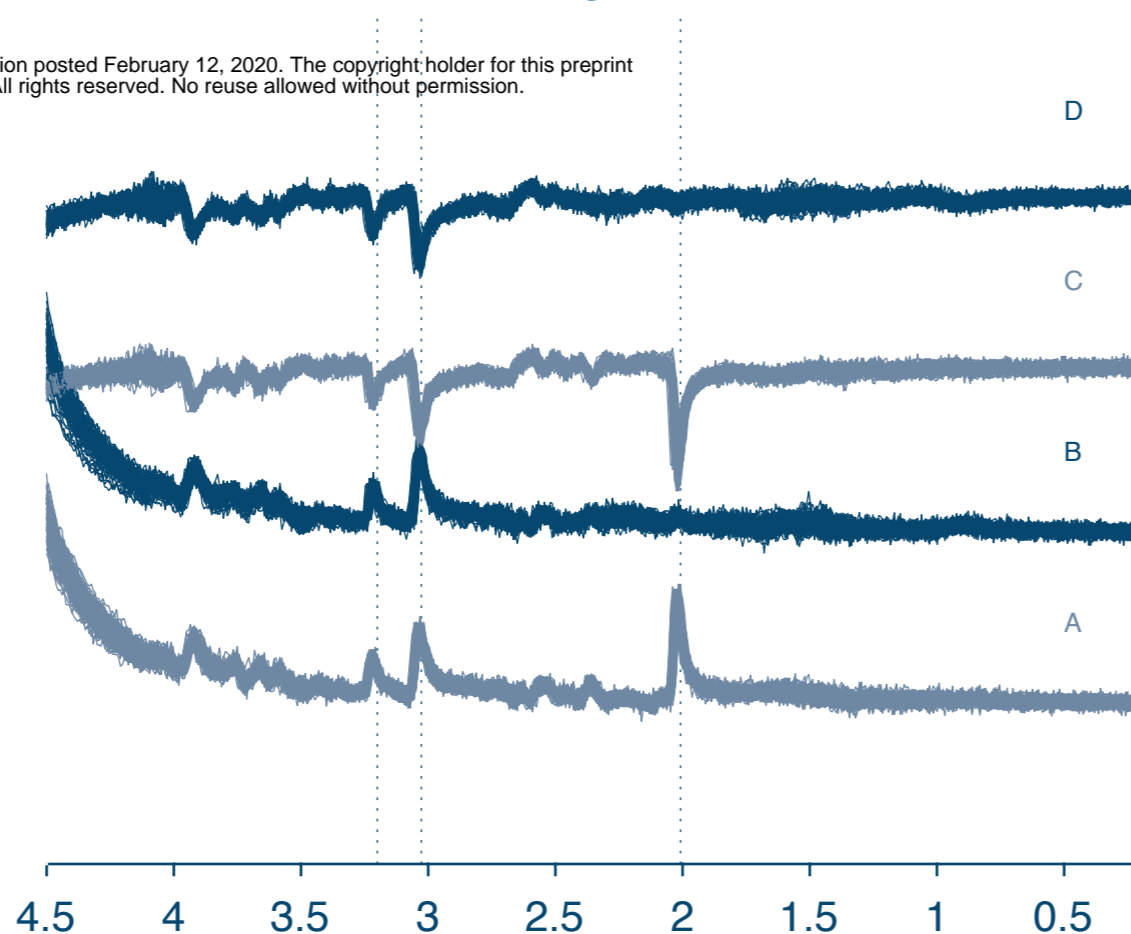

### Frequency drift

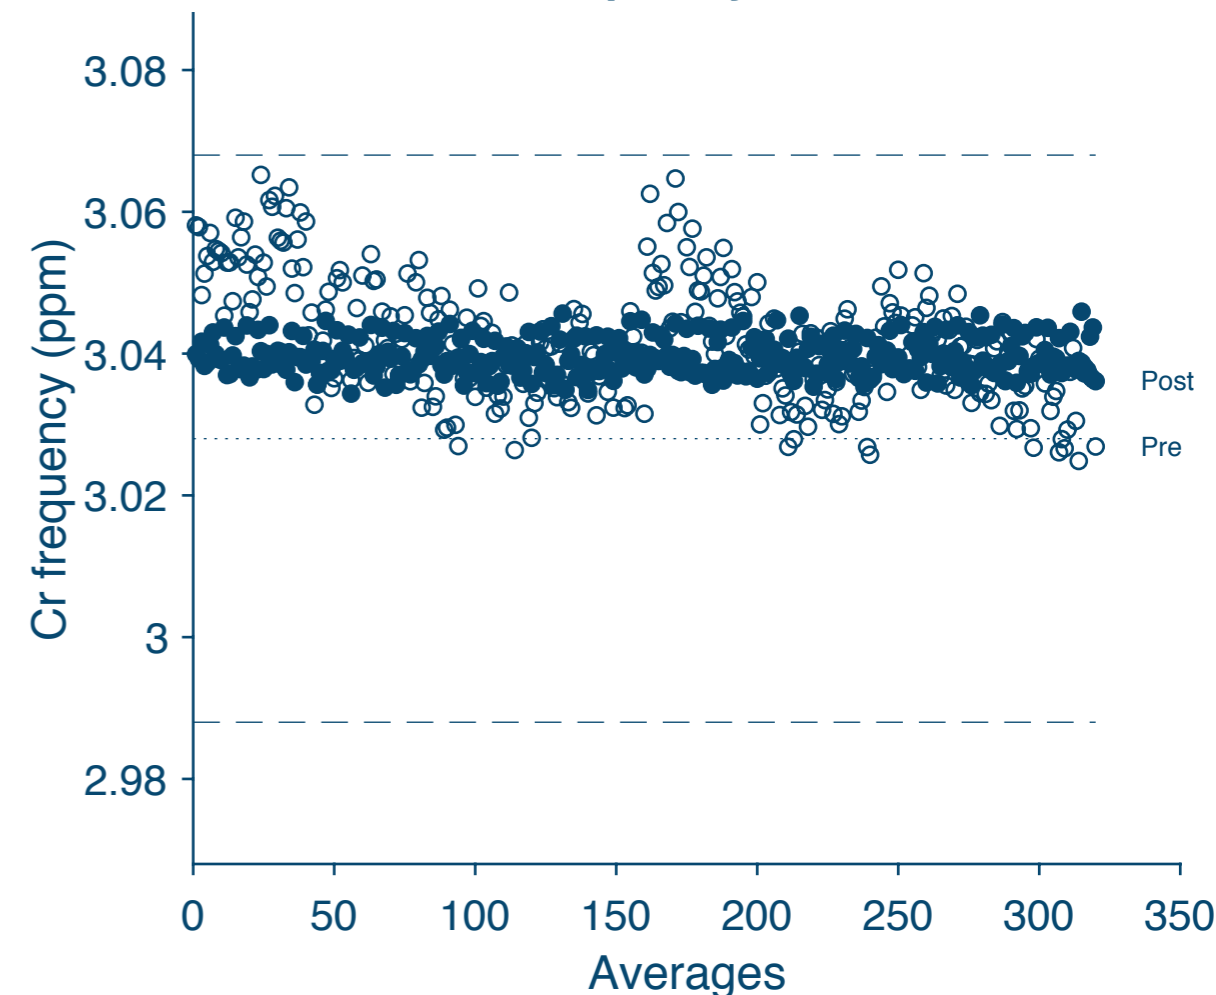

### Post-alignment

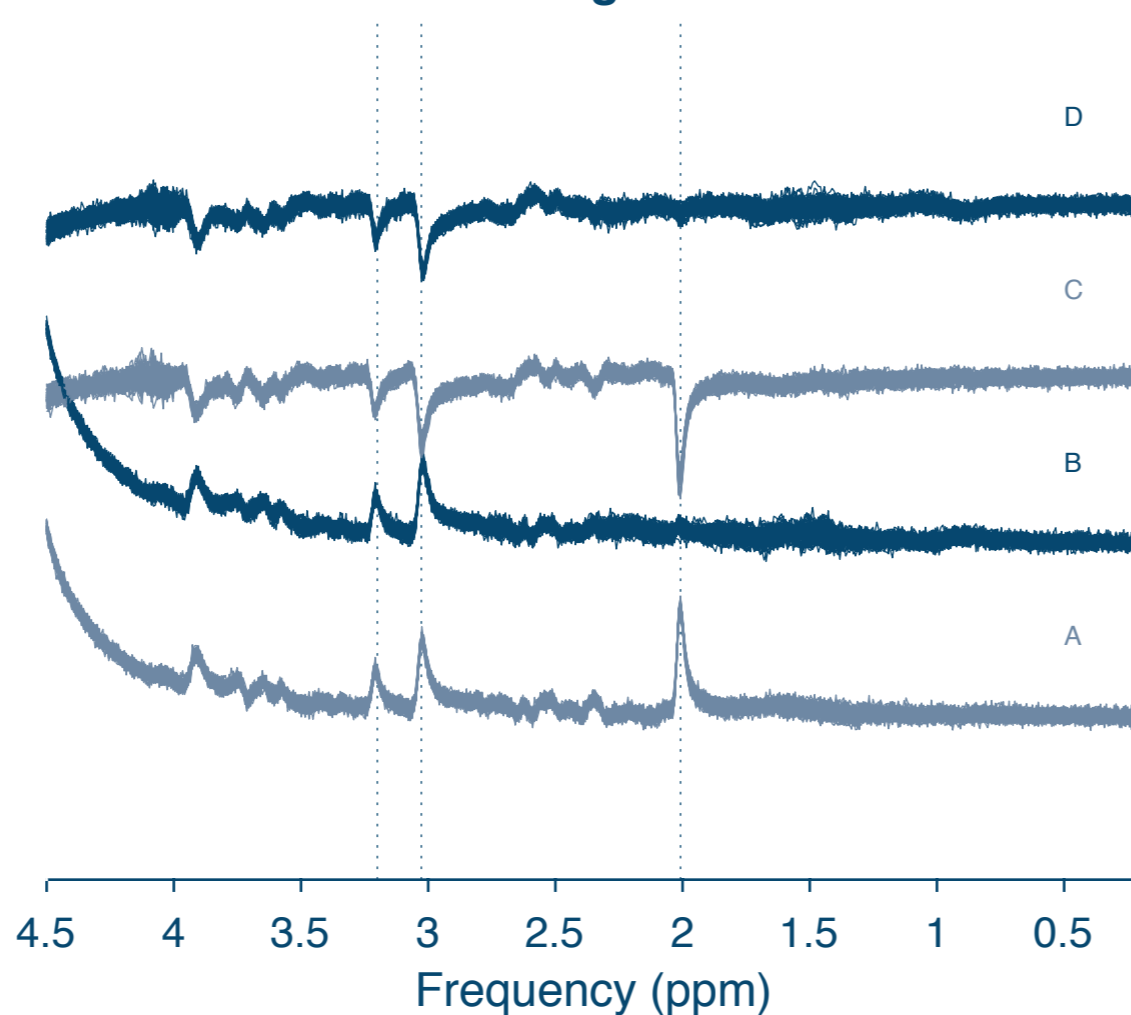

### Aligned and averaged

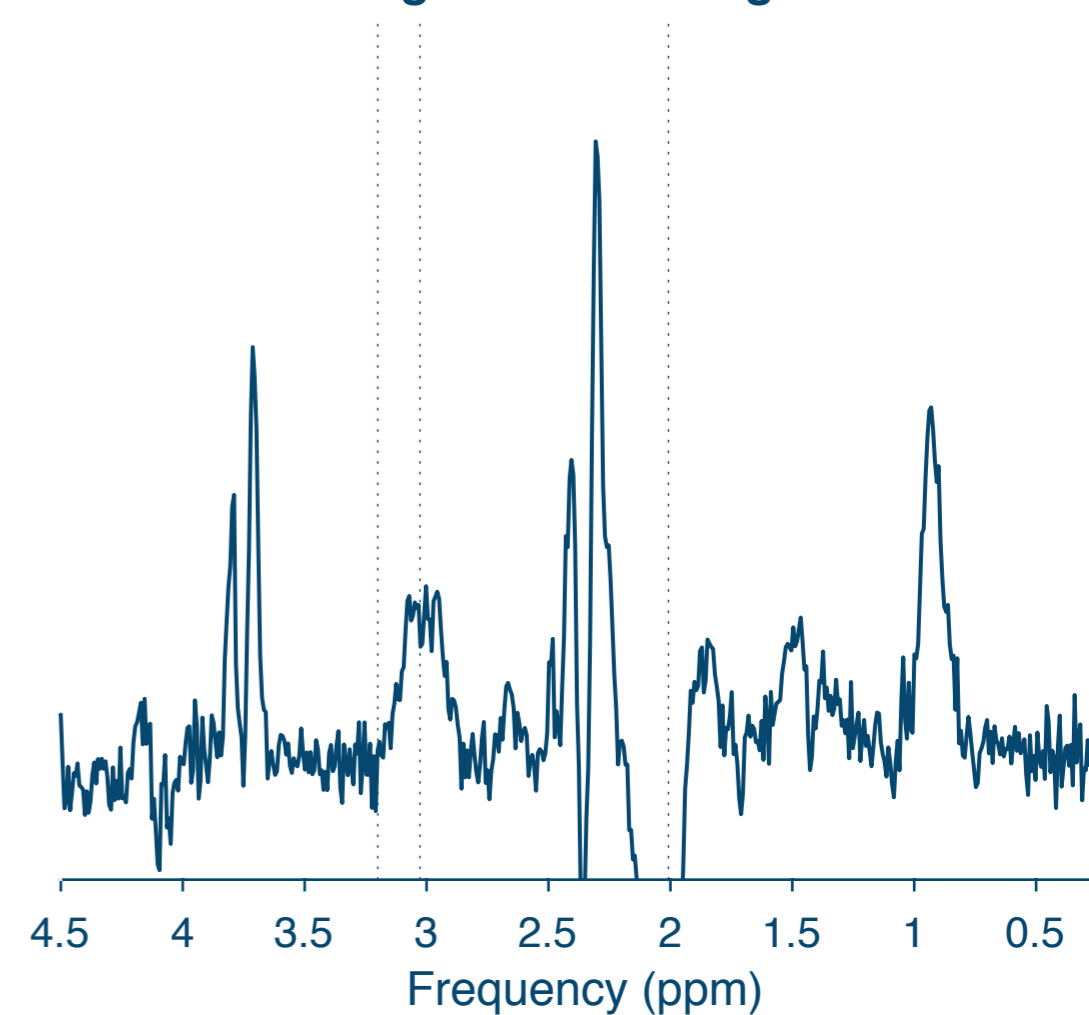

A

B

C

D

diff1

diff2

sum

ref

### MRS Container

```

/HERM_GABA_GSH_data/S01/S01_GGH_4_2_r
/HERM_GABA_GSH_data/S02/S02_GGH_4_2_r
/HERM_GABA_GSH_data/S03/S03_GGH_4_2_r
/HERM_GABA_GSH_data/S05/S05_GGH_4_2_r
/HERM_GABA_GSH_data/S06/S06_GGH_4_2_r
/HERM_GABA_GSH_data/S07/S07_GGH_4_2_r
/HERM_GABA_GSH_data/S09/S09_GGH_4_2_r
/HERM_GABA_GSH_data/S10/S10_GGH_4_2_r

```

A

/Volumes/Samsung\_T5/working/HERM\_GABA\_GSH\_data/S09/S09\_GGH\_4\_2\_raw\_act.SDAT  
 Metabolite Data -> Sequence: HERMES2 GSHS; B0: 3.0005; TE / TR: 80 / 2000 ms ; spectral bandwidth: 2000 Hz  
 raw subspecs: 4; raw averages: 320; averages: 320; Sz: 2048 80 4; dimensions: 36 x 36 x 36 mm = 46.656 ml

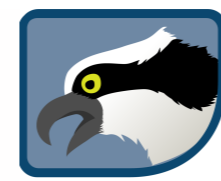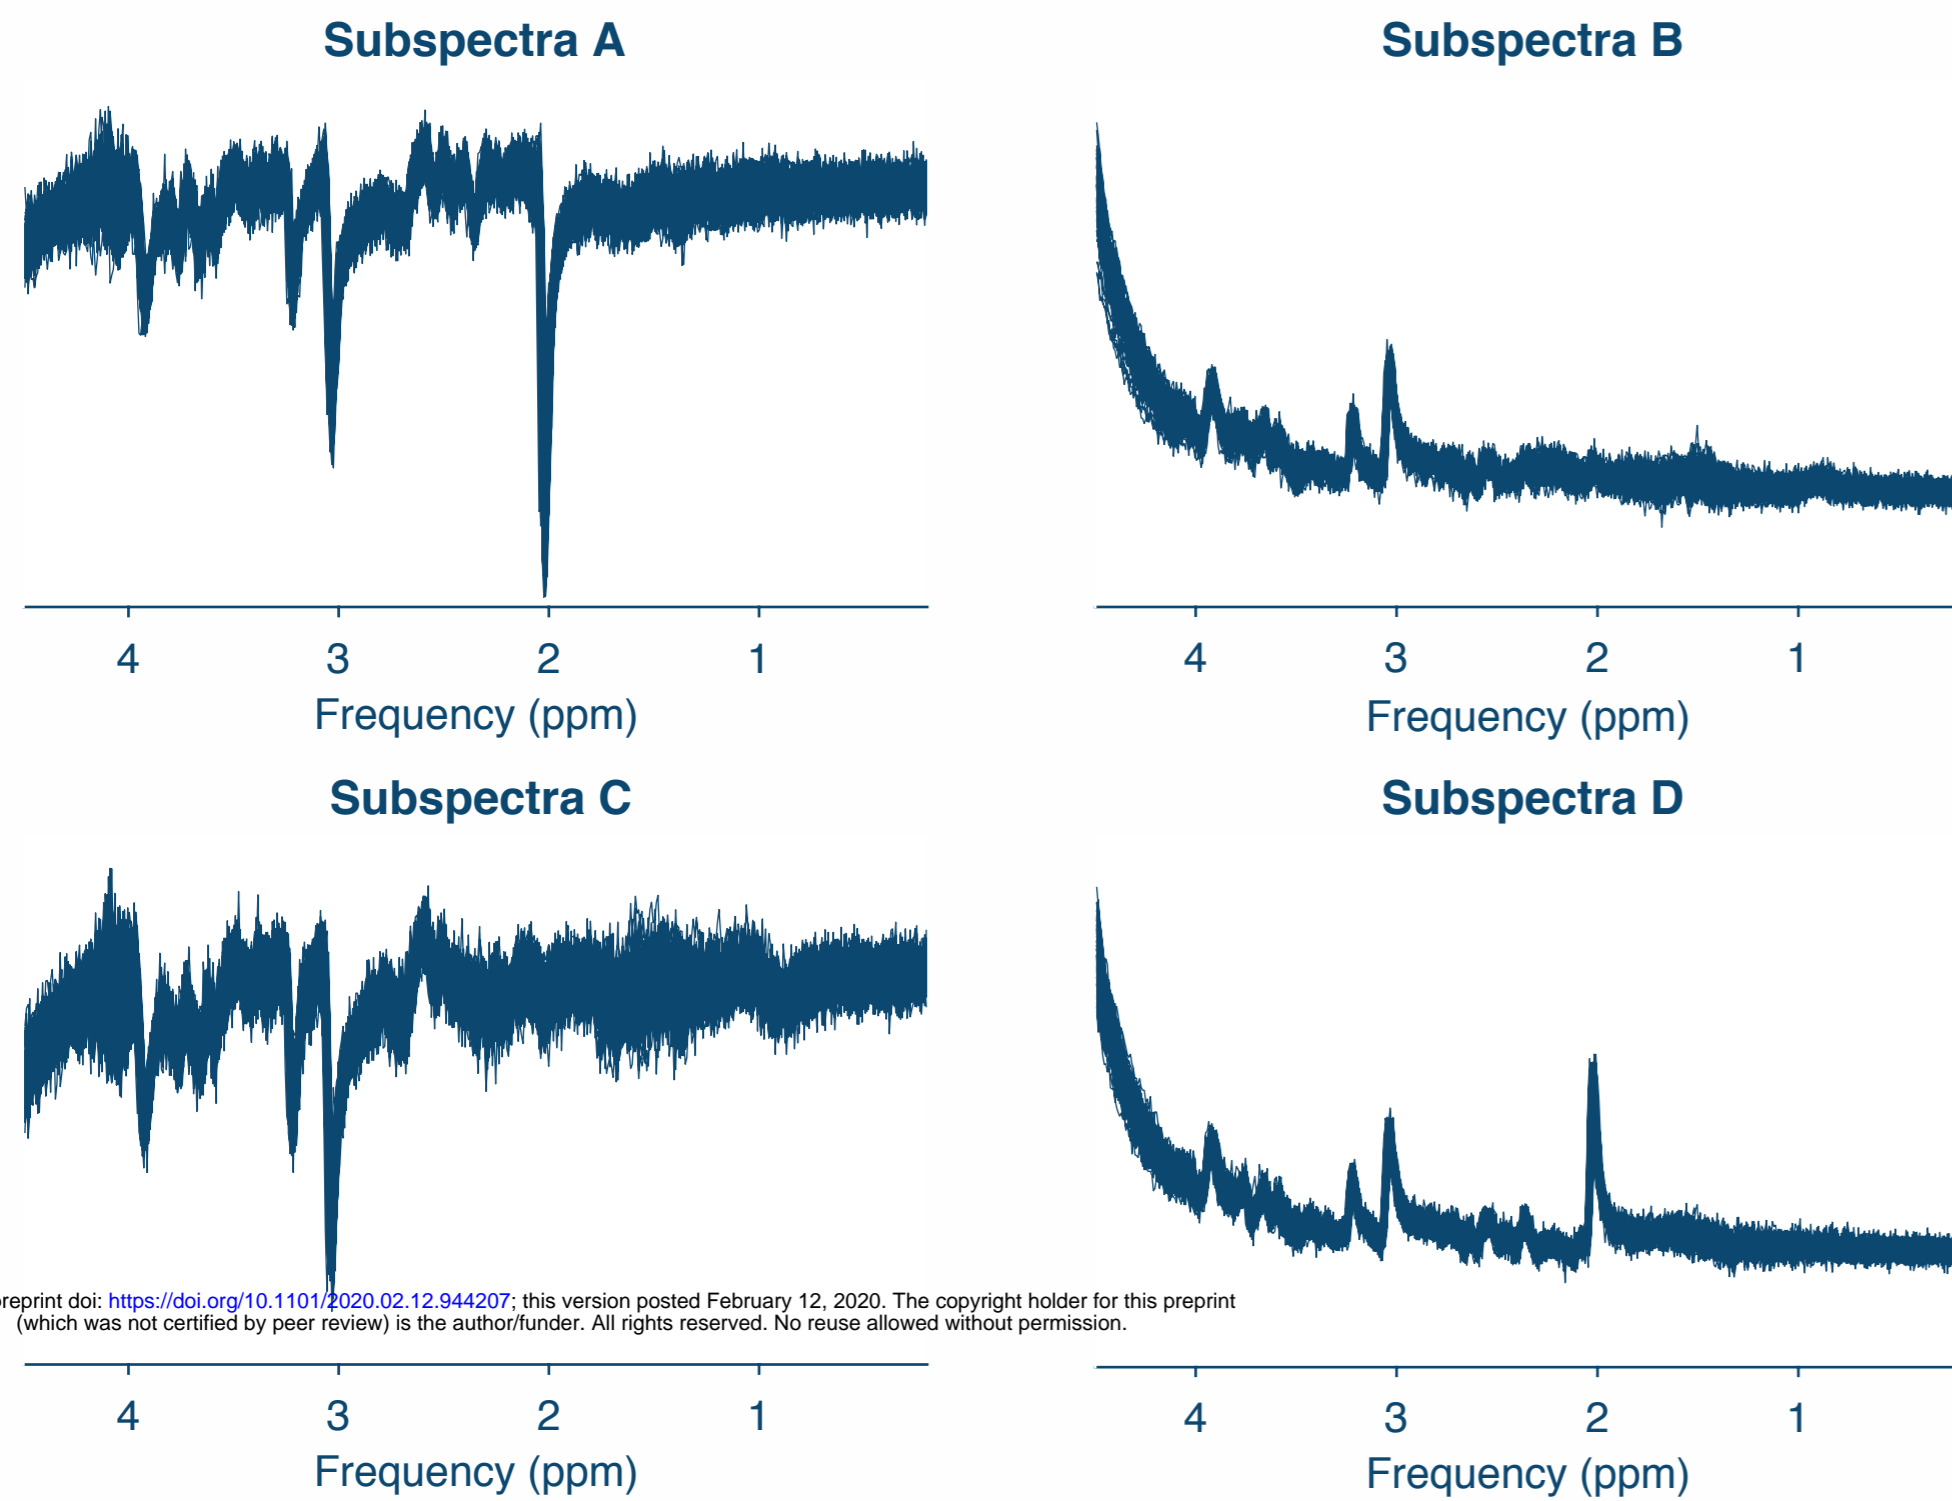

B

/Volumes/Samsung\_T5/working/HERM\_GABA\_GSH\_data/S09/S09\_GGH\_4\_2\_raw\_act.SDAT  
 Metabolite Data -> SNR(GABA): 10.3609; FWHM: 0.2473 / 31.5924 ppm / Hz  
 Reference shift: 0.89488 Hz  
 Average Delta F0 Pre Registration: 2.7948 Hz; Average Delta F0 Post Registration: 2.4991 Hz

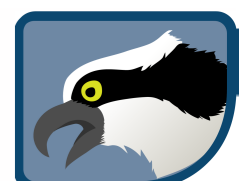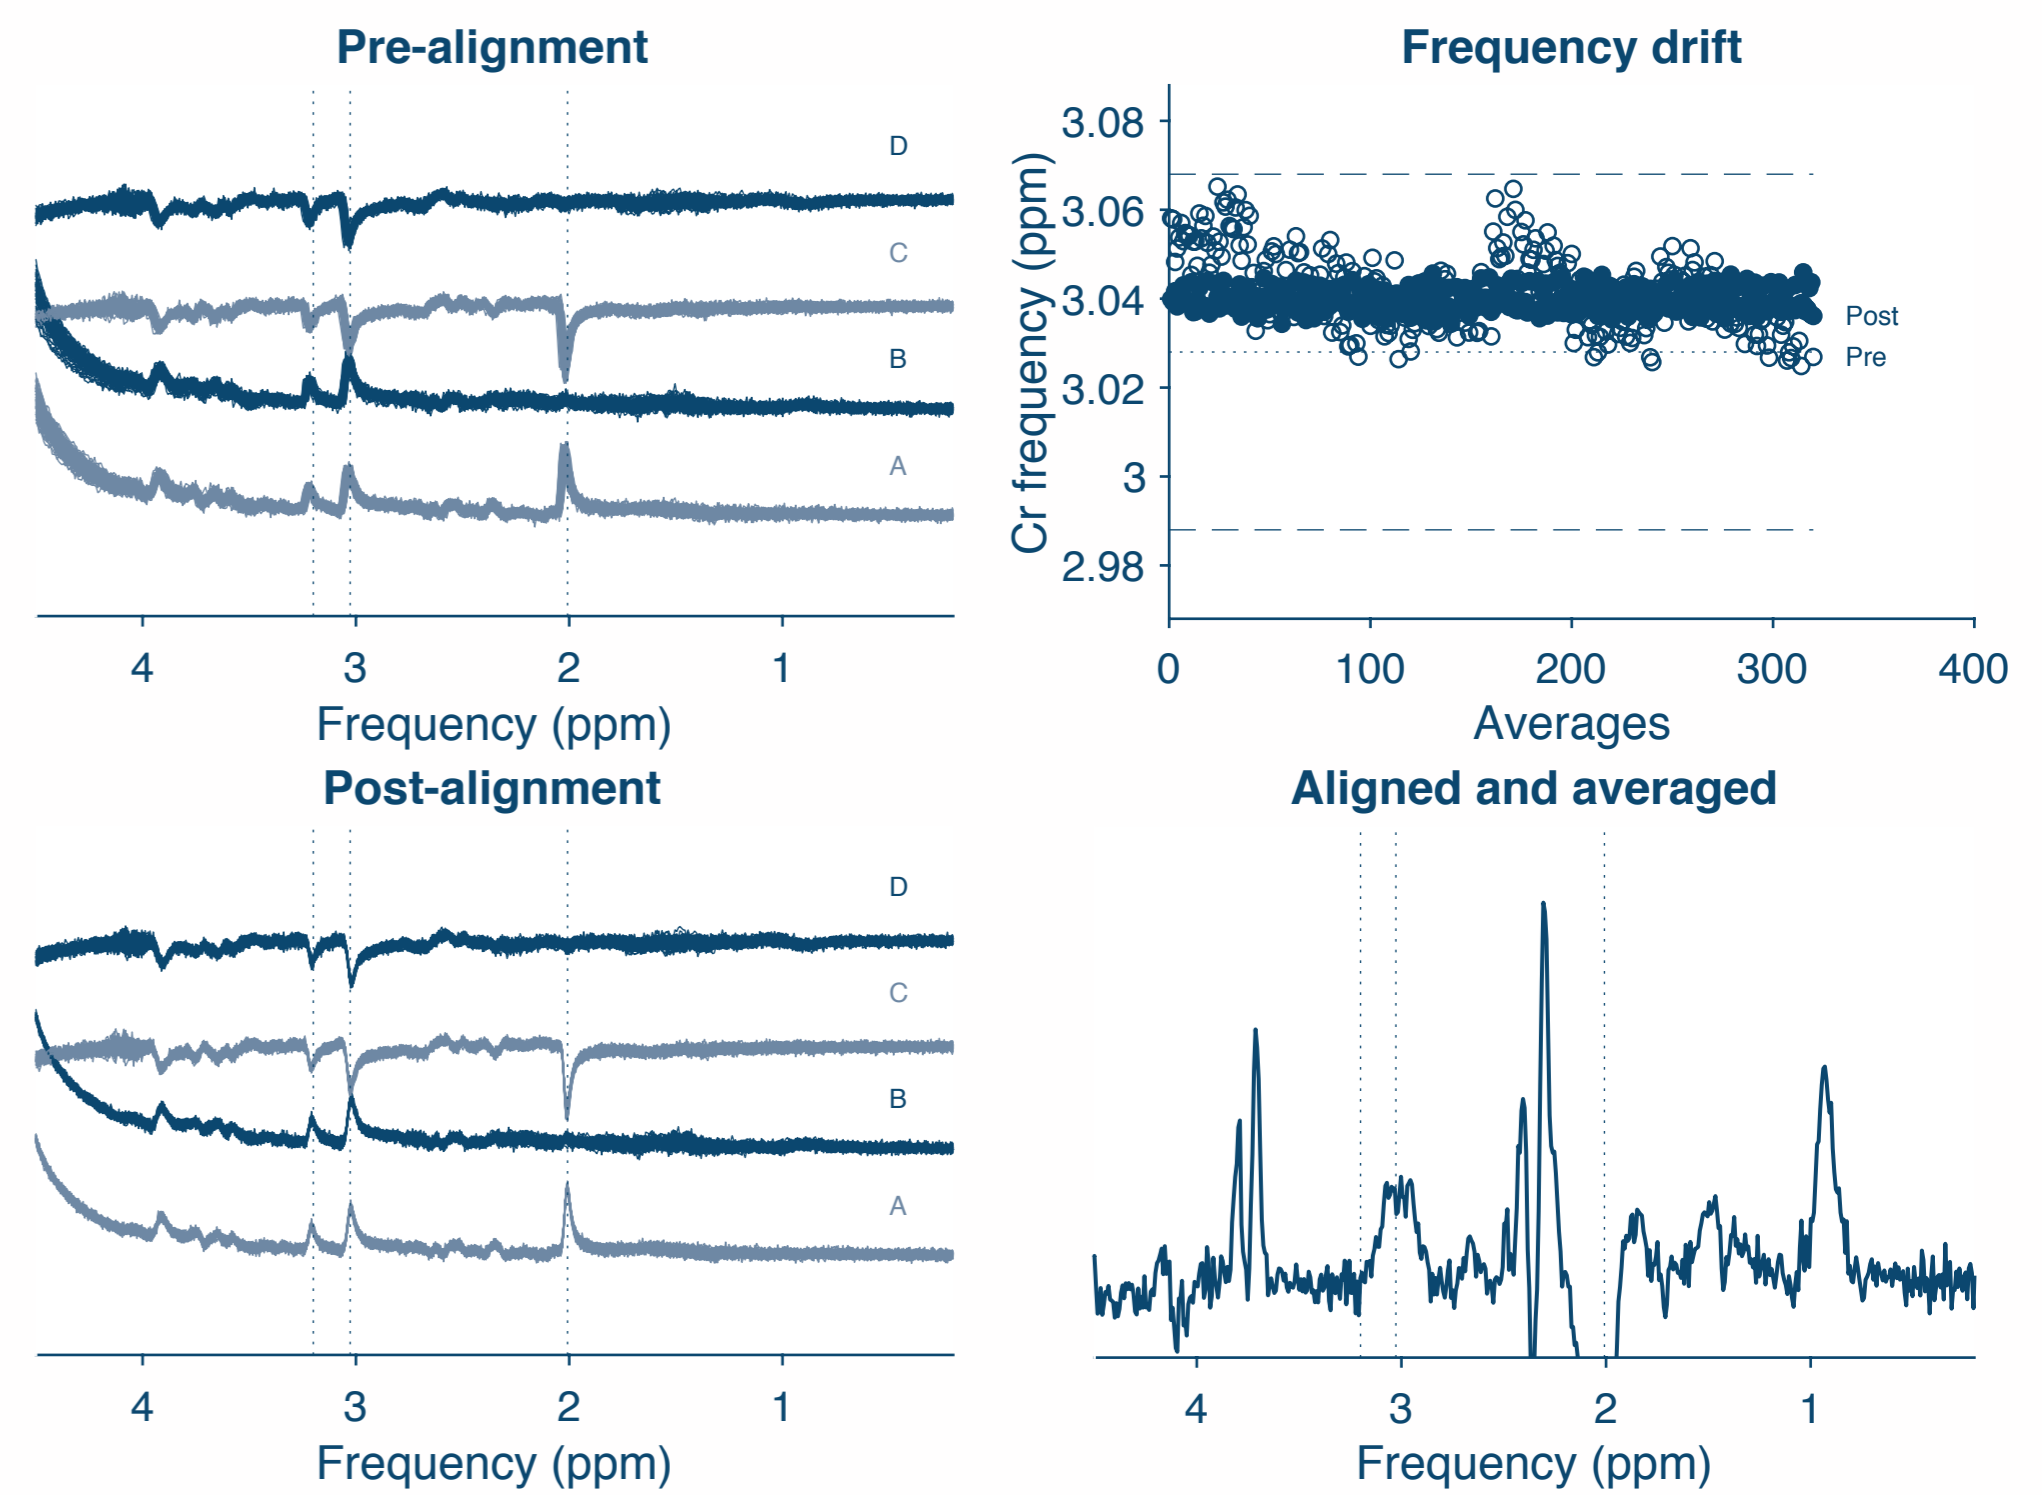

C

/Volumes/Samsung\_T5/working/HERM\_GABA\_GSH\_data/S09/S09\_GGH\_4\_2\_raw\_act.SDAT  
 Metabolite Data -> Sequence: HERMES2 GSHS; Fitting algorithm: LCModel; Fitting Style: Separate; Selected subspecs: diff1  
 Fitting range: 0.5 to 4 ppm; Baseline knot spacing: 0.4 ppm  
 Number of metabolites: 18; Number of macro molecules: 8 scale: 1.6886

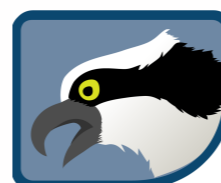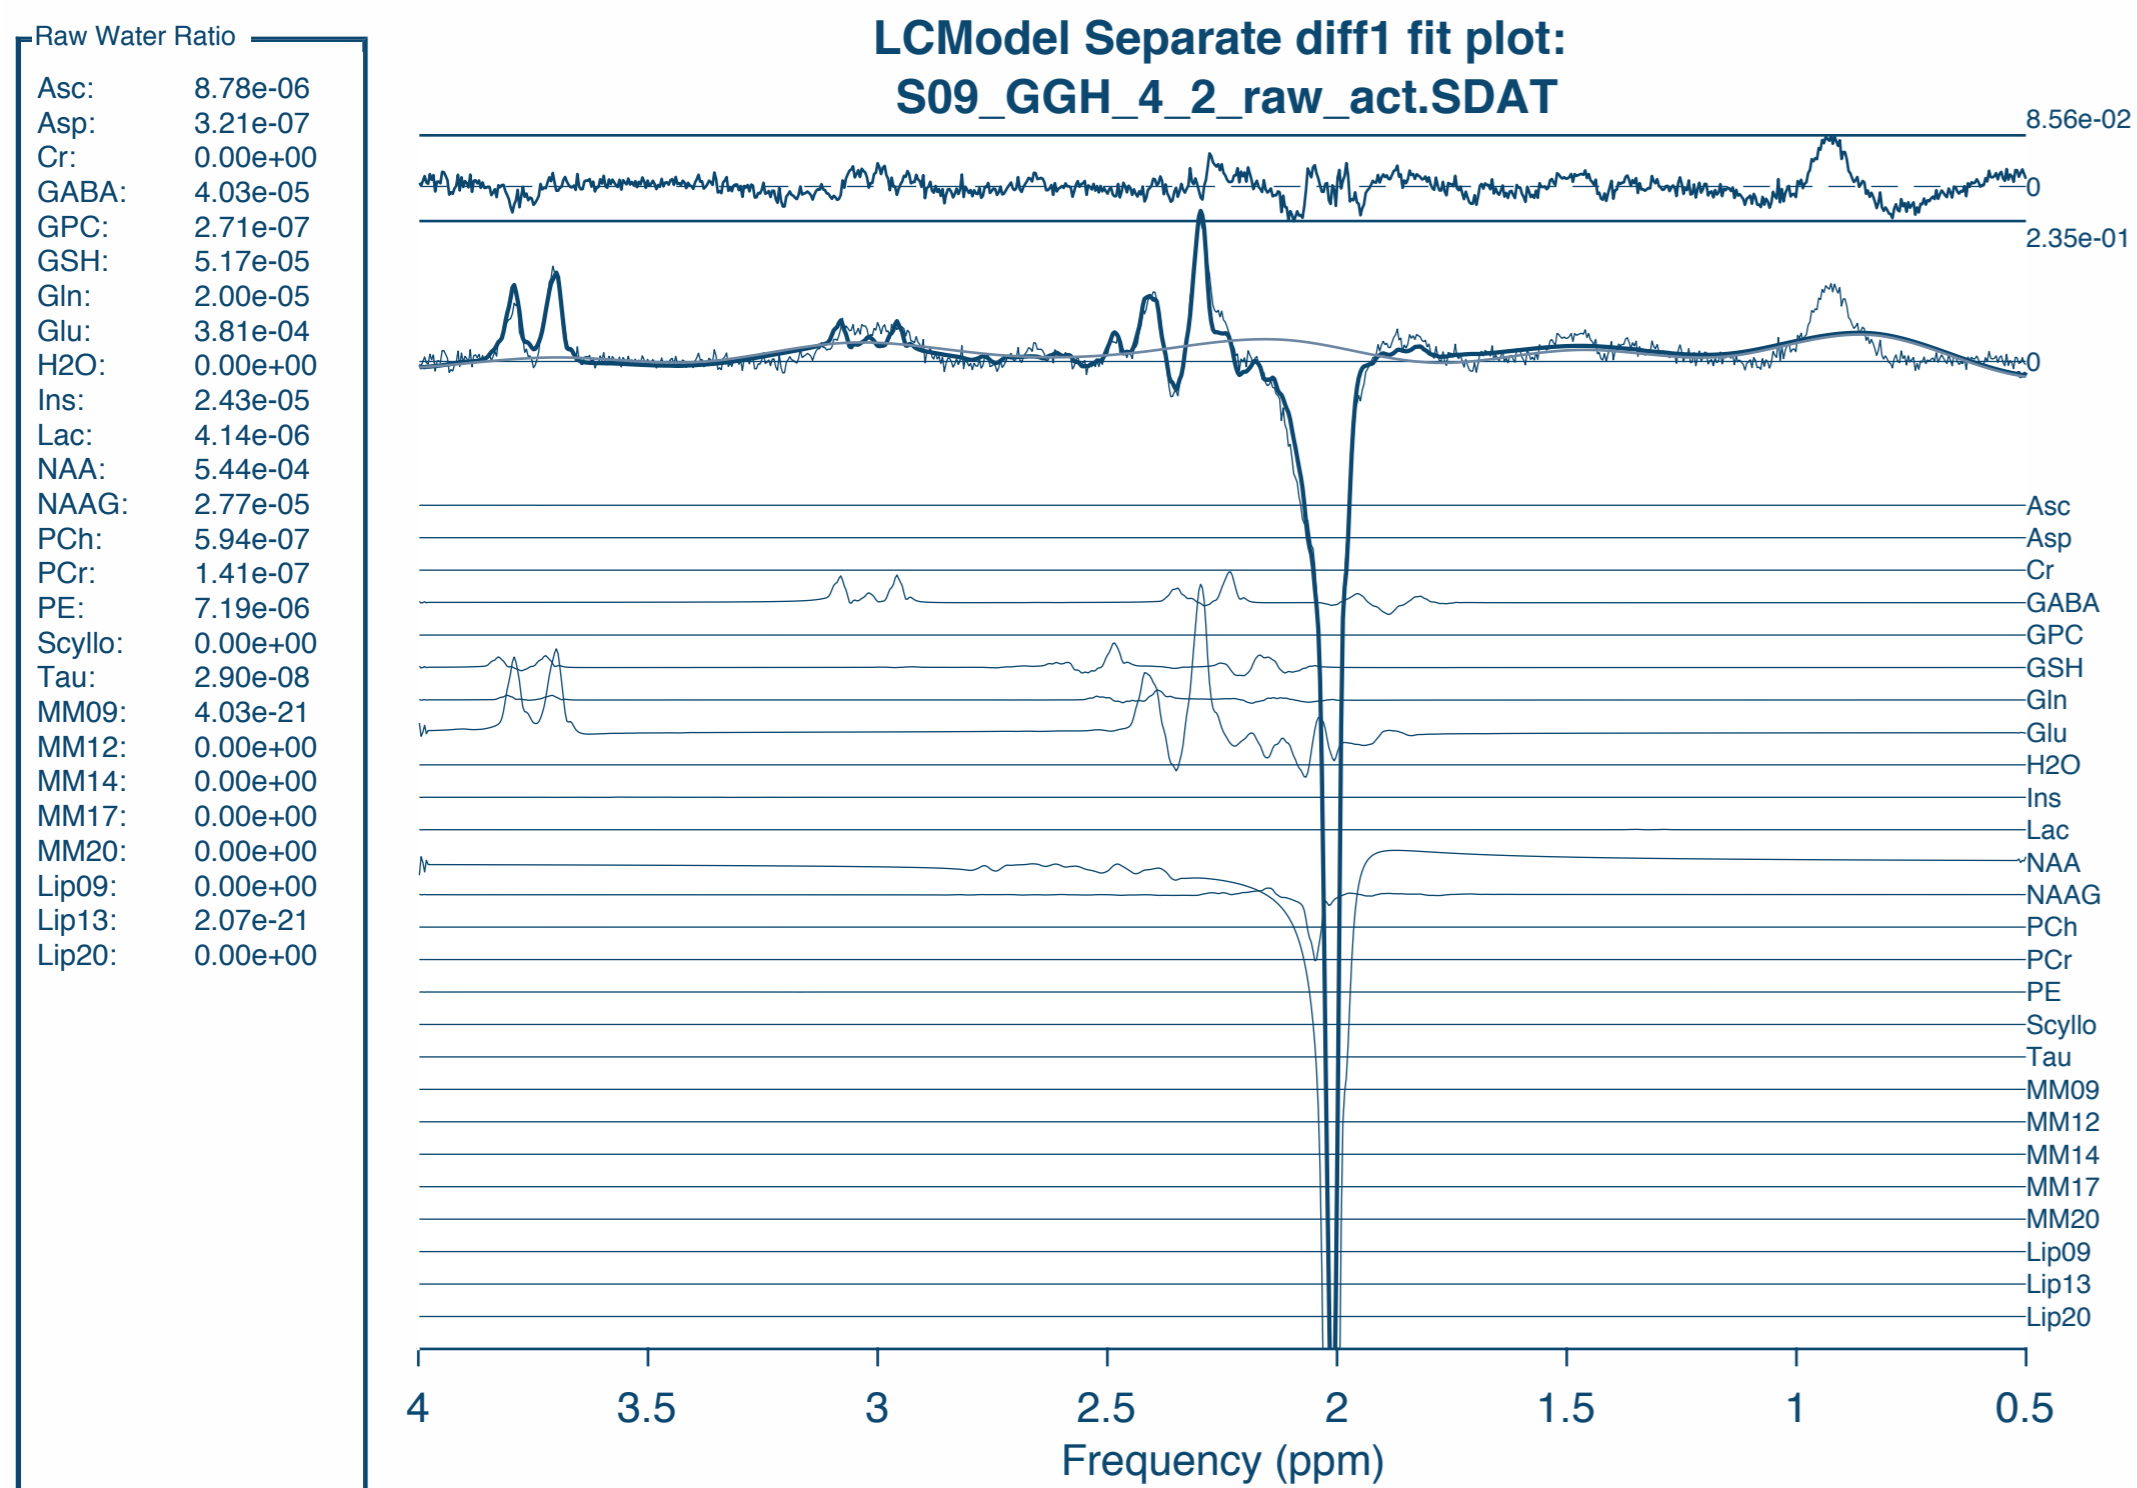

D

/Volumes/Samsung\_T5/working/HERM\_GABA\_GSH\_data/S09/S09\_GGH\_4\_2\_raw\_act.SDAT  
 Metabolite Data -> Sequence: HERMES2 GSHS; B0: 3.0005; TE / TR: 80 / 2000 ms ; spectral bandwidth: 2000 Hz  
 raw subspecs: 4; raw averages: 320; averages: 320; Sz: 2048 80 4; dimensions: 36 x 36 x 36 mm = 46.656 ml

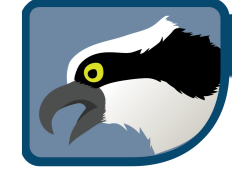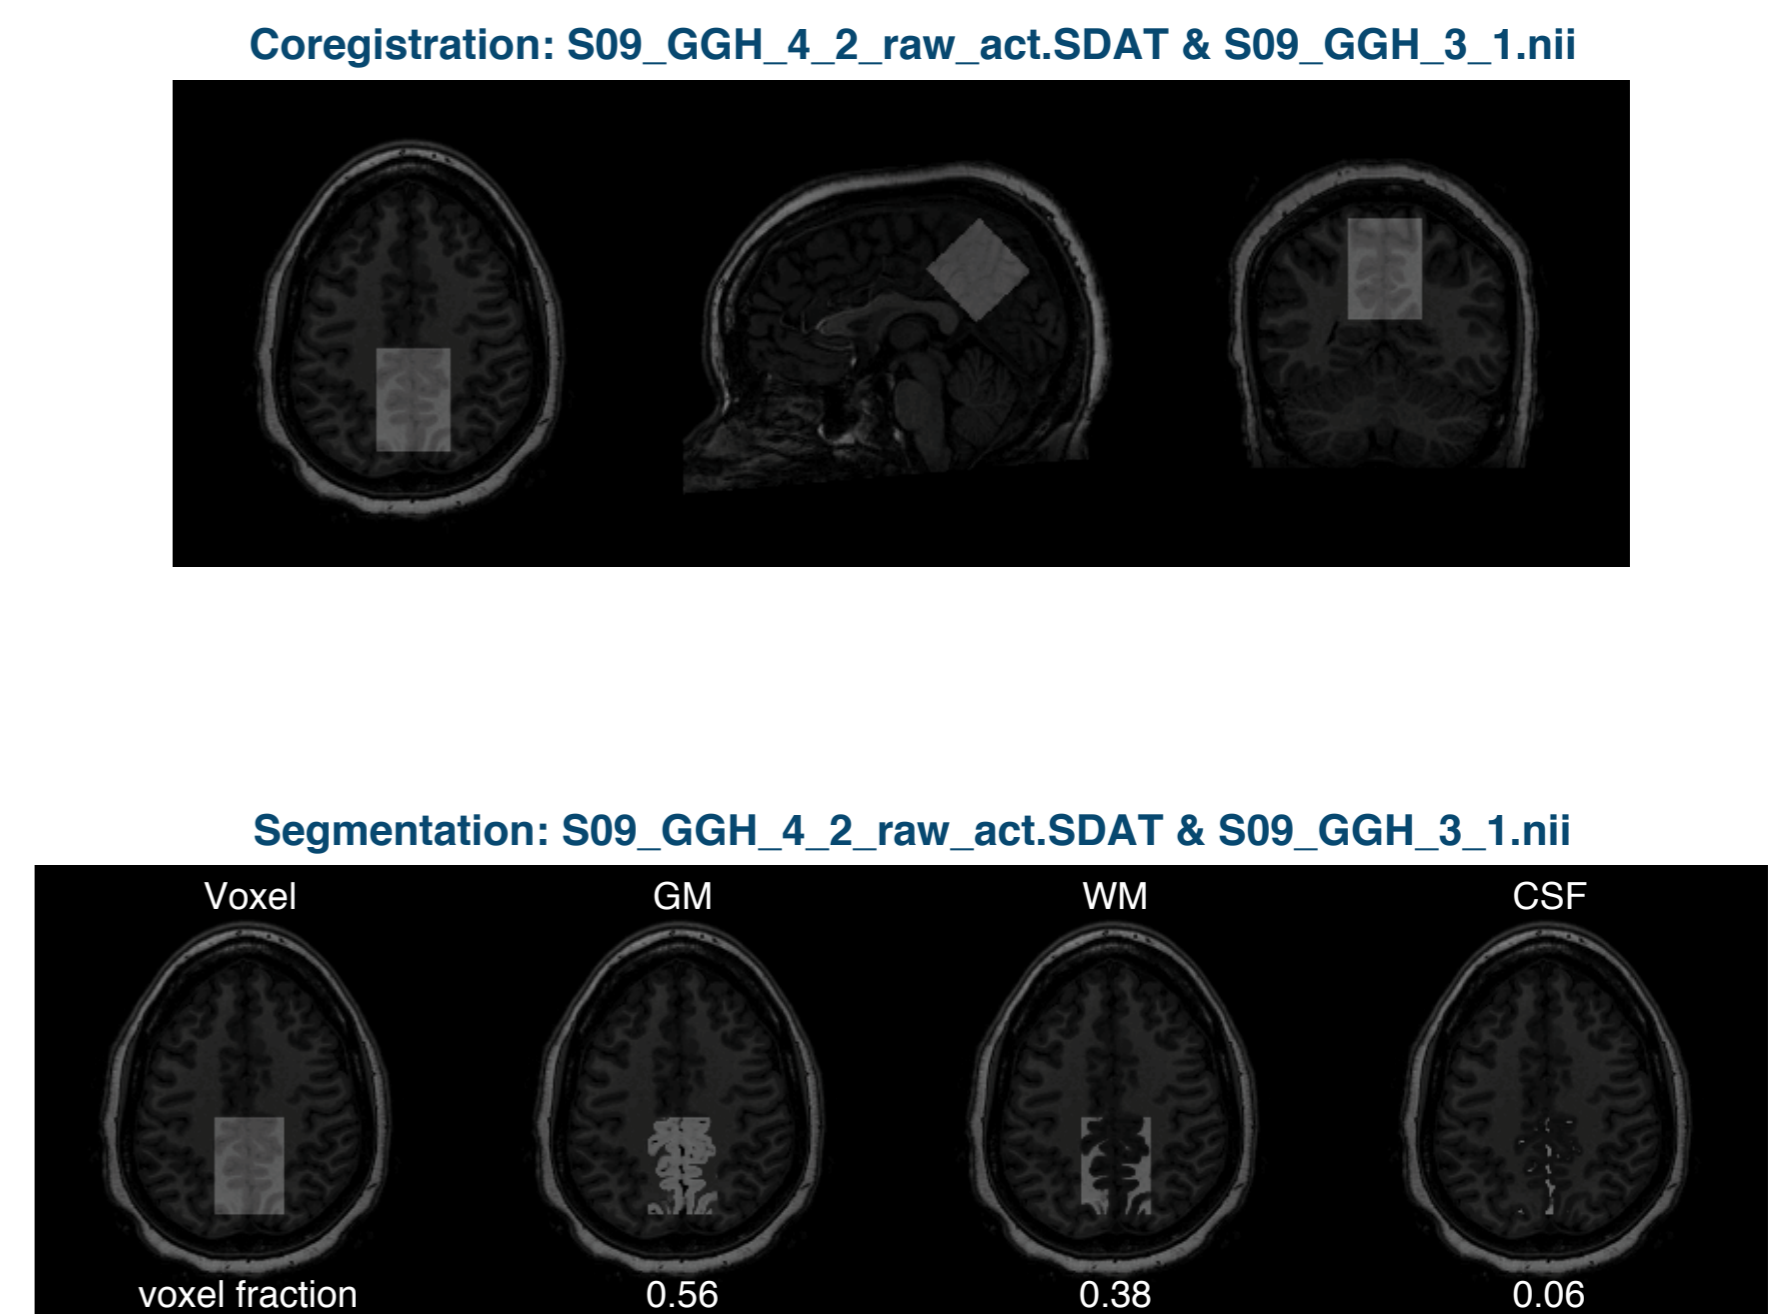

Source: https://www.biorxiv.org/content/10.1101/2020.02.12.944207v1.full.pdf
